# Supplementary material for: FeCl2/TBAC efficiently catalyzes domino coupling reactions for constructing indoline-fused tetrahydroisoquinolines
Source: Royal Society of Chemistry journal article supplement (doi:10.1039/d2nj04177d), 2022-01-01

Supporting Information for:

**FeCl<sub>2</sub>/TBAC efficiently catalyze the domino coupling reaction for constructing the indoline-fused tetrahydroisoquinolines**

Zhonghua Sun,<sup>a</sup> Jie Yao,<sup>a</sup> Shuliang Ji,<sup>b</sup> Weiyu Zhou,<sup>a,c\*</sup> Anwei Wang,<sup>a</sup> Mingyang He<sup>a</sup> Xianjun Hua<sup>a</sup> and Yupeng Liu<sup>c\*</sup>

<sup>a</sup> Jiangsu Key Laboratory of Advanced Catalytic Materials and Technology, Changzhou University, Changzhou 213164, China.

<sup>b</sup> Jiangsu Yabang Dyestuff Co., LTD, Changzhou 213163, China

<sup>c</sup> Jiangsu Key Laboratory of Biomass Energy and Material, Jiangsu Province, Nanjing 210037, China

## Table of Contents

|                                                                                 |     |
|---------------------------------------------------------------------------------|-----|
| Table of Contents.....                                                          | S2  |
| Experimental.....                                                               | S3  |
| Optimization of the reaction conditions .....                                   | S6  |
| Effect of the amount of TBAC on the reaction.....                               | S7  |
| The reaction results for some substrates with or without of TBAC .....          | S8  |
| The catalytic results between <b>1i</b> and <b>2a</b> with or without TBAC..... | S9  |
| ESI-MS spectra of imine intermediate .....                                      | S10 |
| Spectrometric data for the products:.....                                       | S11 |
| References.....                                                                 | S16 |
| NMR spectra.....                                                                | S17 |

## Experimental

### Chemicals and reagents

All the reagents and solvents in the study were analytically pure and were all purchased from Energy or Aladdin and used as received. *N*-phenyl-1,2,3,4-tetrahydroisoquinoline and its derivatives were prepared from corresponding tetrahydroisoquinolines and aryl halides according to the reported method.<sup>[1]</sup> 1-Deutero-2-phenyl-1,2,3,4-tetrahydroisoquinoline (**1a-d<sub>1</sub>**) was synthesized according to reported method,<sup>[2]</sup> and the purity of **1a-d<sub>1</sub>** was 92% according to <sup>1</sup>HNMR analysis. 2-(phenyl-d<sub>5</sub>)-1,2,3,4-tetrahydroisoquinoline (**1a-d<sub>5</sub>**) was synthesized according to the reported method using 1-bromobenzene-2,3,4,5,6-d<sub>5</sub> as the substrate, and the purity of **1a-d<sub>5</sub>** was 99% according to GC-MS analysis. And other substrates (98%~99% purity) were also purchased from Energy or Aladdin and used as received.

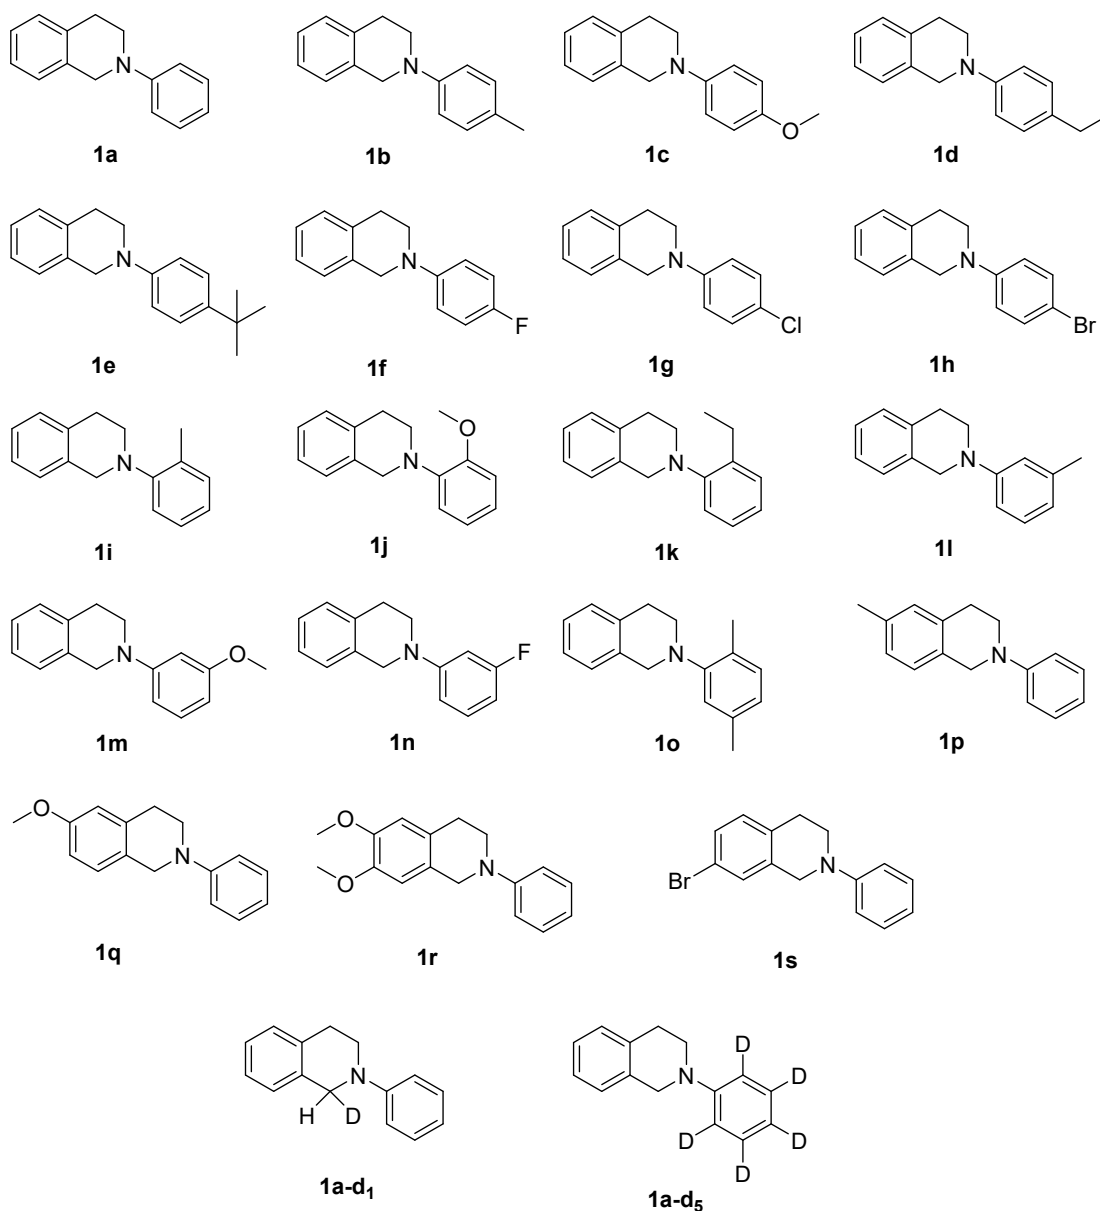

### Catalytic cascade coupling/cyclization reaction between *N*-phenyl-1,2,3,4-tetrahydroisoquinoline and malononitrile

Typically, a mixture of *N*-phenyl-1,2,3,4-tetrahydroisoquinoline (0.50 mmol), malononitrile (1.5 mmol), FeCl<sub>2</sub> (31.7 mg, 0.25 mmol), toluene (2 mL) and TBAC (tetrabutylammonium chloride) (6.9 mg, 0.025 mmol) in a carousel reaction tube (Figure S1) was magnetically stirred at 80 °C under an 1 atm of oxygen atmosphere. The reaction was monitored by TLC (thin-layer chromatography, petroleum ether/ethyl acetate (10:1, v/v)) and analyzed through a GC-MS (SHIMADZU, GCMS-QP2010

SE). After completion of the reaction, the reaction mixture was cooled. The conversion of the substrate and the selectivity of quinoline were obtained on the basis of the GC-MS analysis.

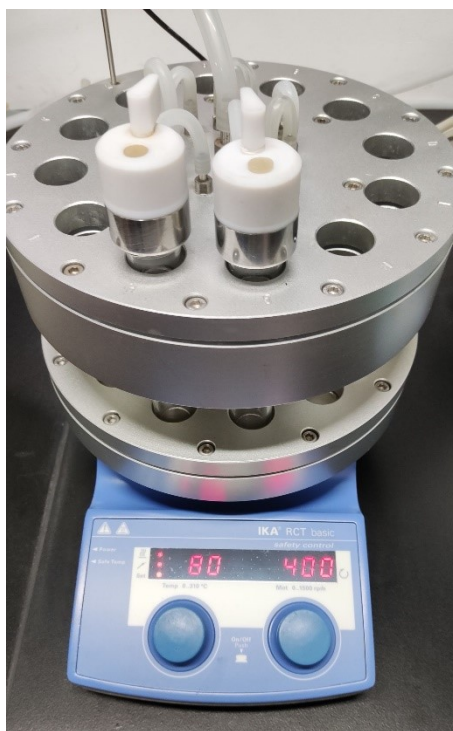

**Fig. S1.** The photographs of the reactor and the reaction.

*Catalytic cascade coupling/cyclization reaction between N-phenyl-1,2,3,4-tetrahydroisoquinoline derivatives and other nucleophiles*

A mixture of *N*-phenyl-1,2,3,4-tetrahydroisoquinoline derivative (0.50 mmol), nucleophile (1.5 mmol), FeCl<sub>2</sub> (31.7 mg, 0.25 mmol), toluene (2 mL) and TBAC (tetrabutylammonium chloride) (6.9mg, 0.025 mmol) in a carousel reaction tube was stirred at 80 °C under 1 atm of oxygen. After the finish of the reaction monitored by TLC (thin-layer chromatography, petroleum ether/ethyl acetate 10:1 (v/v)), the mixture was cooled and purified using flash chromatography to give the corresponding product. NMR spectra were recorded on a Bruker ADVANCE NMR spectrometer. The melting point was analyzed on a OptiMelt Automated Melting Point System. Silica gel 60 F254 thin-layer chromatography plates (Sinopharm) was used for the thin-layer chromatography using petroleum ether/ethyl acetate (10:1, v/v) as the mobile phase.

*Electron paramagnetic resonance (EPR) experiments*

X-band continuous-wave EPR spectra were obtained using a Bruker EMX Plus 6/1 spectrometer equipped with a dual-mode cavity (ER 4116DM). The solution of *N*-phenyl-1,2,3,4-tetrahydroisoquinoline derivative (0.50 mmol), malononitrile (1.5 mmol), FeCl<sub>2</sub> (31.7 mg, 0.25 mmol) and TBAC (6.9mg, 0.025 mmol) in toluene (2 mL) was stirred for 1 h at 80 °C and 100 μL of the solution was sampled in EPR tube, which were cooled 5 K prior to measurements. EPR analysis was carried out at low temperature on EPR spectrometer operated at 9.802 GHz. Typical spectrometer parameters are shown as follows, sweep width: 4000 G; center field: 3000 G; time constant: 10.24 ms; sweep time: 184.32 s; scan number: 5; modulation amplitude: 1.0 G; modulation frequency: 100 kHz; microwave power: 20.13 mW.

*Larger scale reaction between N-phenyl-1,2,3,4-tetrahydroisoquinoline and malononitrile*

A mixture of *N*-phenyl-1,2,3,4-tetrahydroquinoline (1.05 g, 5.0 mmol), malononitrile (15.0 mmol), FeCl<sub>2</sub> (0.32 g, 2.5 mmol), toluene (15 mL) in a 100 mL round-bottom flask was magnetically stirred at 80 °C under an 1 atm of oxygen atmosphere. The reaction was monitored by TLC (petroleum ether/ethyl acetate (10:1, v/v)). After completion of the reaction (12 h), the reaction

mixture was cooled and separated by filtration to remove the catalyst. The filtrate was purified using flash chromatography to give 1.06 g of **3aa** in a 78% yield (Scheme S1).

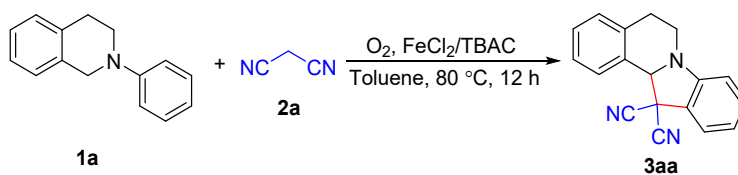

**Scheme S1.** Larger scale reaction.

#### *Kinetic isotope effect studies*

For the calculation of intramolecular isotopic value, the reaction was performed as described above except for the use of **1a-d<sub>1</sub>** instead of **1a**. When **1a-d<sub>1</sub>** was completely converted, Kinetic isotopic effects (KIE) values  $k_H/k_D$  were calculated based on the GC-MS analysis. On the other hand, for the calculation of intermolecular isotopic value, the reactions were performed as described above except for the use of the mixture of **1a-d<sub>5</sub>** and **1a** as the substrates. When the substrates were completely converted, KIE values  $k_H/k_D$  were calculated based on the GC-MS analysis. For the calculation of KIE values, it was taken into account that substrates **1a-d<sub>1</sub>** and **1a-d<sub>5</sub>** were 92% and 99% pure, respectively.

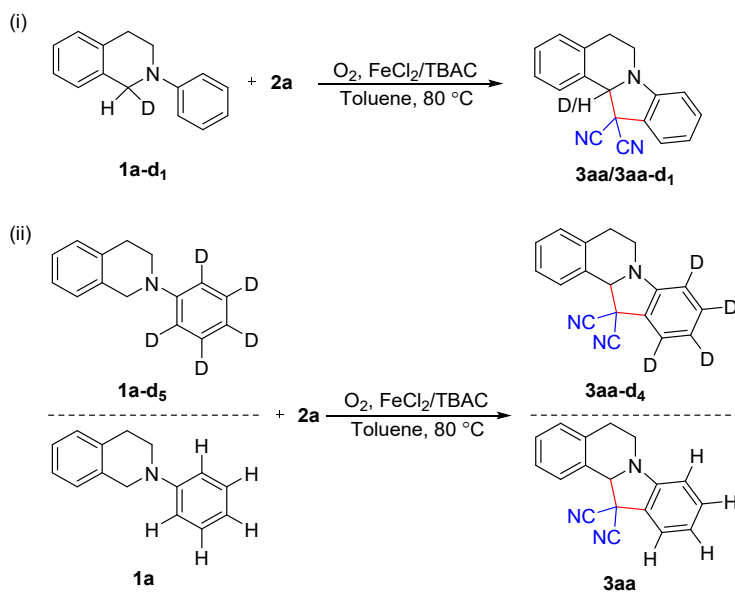

**Scheme S2.**

## Optimization of the reaction conditions

The reaction between *N*-phenyl-1,2,3,4-tetrahydroisoquinoline (**1a**) and malononitrile (**2a**) was selected as the model reaction to optimize the reaction conditions (Table S1). Initially, various iron salts were screened, and FeCl<sub>2</sub> gave the highest conversion and selectivity to **3aa** (Entries 1-6), while lower selectivity was observed for FeCl<sub>2</sub>·4H<sub>2</sub>O with comparable conversion of **1a**. These results indicated that water in the system affected the selectivity. Oxygenated product was confirmed to be the main by-product (**4a**). Then the solvent, the ratio of **2a/1a** and the reaction temperature were investigated in sequence. After the optimization, a 95.3% conversion with a good 92.9% selectivity to the **3aa** could be obtained with toluene as the solvent (Entry 12). To further investigate the reaction conditions, various additives have also been investigated, and TBAC could obviously improve the selectivity to **3aa**. Although TBAI could efficiently increase the conversion of **1a**, the selectivity to oxygenated product increased (Entry 23). Some chloro salts including NaCl and NH<sub>4</sub>Cl, were also tested, and the best results was obtained in case of TBAC (Entry 21). Finally, an excellent 95.5% selectivity was observed with a >99% conversion when prolonging the reaction time to 12 h (Entry 33).

**Table S1.** Optimization of the reaction conditions.<sup>[a]</sup>

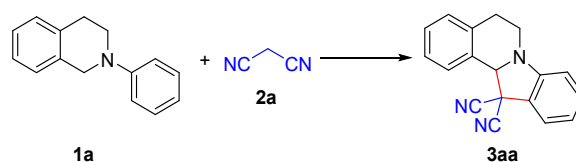

| Entry             | Catalyst                                             | Solvent            | Temp. /°C | <b>2a/1a</b> | Conv. <sup>[b]</sup> /% | Sel. <sup>[b]</sup> /% |
|-------------------|------------------------------------------------------|--------------------|-----------|--------------|-------------------------|------------------------|
| 1                 | FeCl <sub>2</sub>                                    | 1,4-dioxane        | 80        | 3            | 85.5                    | 91.8                   |
| 2                 | FeCl <sub>2</sub> ·4H <sub>2</sub> O                 | 1,4-dioxane        | 80        | 3            | 82.6                    | 72.3                   |
| 3                 | FeCl <sub>3</sub>                                    | 1,4-dioxane        | 80        | 3            | 39.9                    | 91.2                   |
| 4                 | FeCl <sub>3</sub> ·6H <sub>2</sub> O                 | 1,4-dioxane        | 80        | 3            | 78.2                    | 72.0                   |
| 5                 | FeSO <sub>4</sub> ·7H <sub>2</sub> O                 | 1,4-dioxane        | 80        | 3            | trace                   | -                      |
| 6                 | Fe(NO <sub>3</sub> ) <sub>3</sub> ·7H <sub>2</sub> O | 1,4-dioxane        | 80        | 3            | trace                   | -                      |
| 7                 | FeCl <sub>2</sub>                                    | DMF                | 80        | 3            | 80.1                    | 30.6                   |
| 8                 | FeCl <sub>2</sub>                                    | DMSO               | 80        | 3            | >99                     | 58.6                   |
| 9                 | FeCl <sub>2</sub>                                    | H <sub>2</sub> O   | 80        | 3            | trace                   | -                      |
| 10                | FeCl <sub>2</sub>                                    | acetonitrile       | 80        | 3            | 86.1                    | 50.4                   |
| 11                | FeCl <sub>2</sub>                                    | 1,2-dichloroethane | 80        | 3            | 83.4                    | 83.3                   |
| 12                | FeCl <sub>2</sub>                                    | toluene            | 80        | 3            | 92.3                    | 92.9                   |
| 13                | FeCl <sub>2</sub>                                    | benzotrifluoride   | 80        | 3            | 90.8                    | 83.8                   |
| 14                | FeCl <sub>2</sub>                                    | dodecane           | 80        | 3            | 88.0                    | 49.1                   |
| 15                | FeCl <sub>2</sub>                                    | toluene            | 80        | 1            | 78.9                    | 87.7                   |
| 16                | FeCl <sub>2</sub>                                    | toluene            | 80        | 2            | 93.1                    | 90.8                   |
| 17                | FeCl <sub>2</sub>                                    | toluene            | 80        | 4            | 94.4                    | 91.2                   |
| 18                | FeCl <sub>2</sub>                                    | toluene            | 40        | 3            | trace                   | -                      |
| 19                | FeCl <sub>2</sub>                                    | toluene            | 60        | 3            | 74.5                    | 92.7                   |
| 20                | FeCl <sub>2</sub>                                    | toluene            | 100       | 3            | >99                     | 79.5                   |
| 21 <sup>[c]</sup> | FeCl <sub>2</sub> /TBAC                              | toluene            | 80        | 3            | 95.7                    | 95.8                   |
| 22 <sup>[c]</sup> | FeCl <sub>2</sub> /TBAB                              | toluene            | 80        | 3            | 72.2                    | 94.5                   |
| 23 <sup>[c]</sup> | FeCl <sub>2</sub> /TBAI                              | toluene            | 80        | 3            | >99                     | 90.9                   |
| 24 <sup>[c]</sup> | FeCl <sub>2</sub> /Na <sub>2</sub> CO <sub>3</sub>   | toluene            | 80        | 3            | 94.4                    | 87.0                   |
| 25 <sup>[c]</sup> | FeCl <sub>2</sub> /NaHCO <sub>3</sub>                | toluene            | 80        | 3            | 91.4                    | 87.9                   |
| 26 <sup>[c]</sup> | FeCl <sub>2</sub> /CH <sub>3</sub> COOH              | toluene            | 80        | 3            | 63.8                    | 87.2                   |
| 27 <sup>[c]</sup> | FeCl <sub>2</sub> /CF <sub>3</sub> COOH              | toluene            | 80        | 3            | 80.5                    | 88.3                   |

continued

|                     |                                                    |         |    |   |      |      |
|---------------------|----------------------------------------------------|---------|----|---|------|------|
| 28 <sup>[c]</sup>   | FeCl <sub>2</sub> /KOH                             | toluene | 80 | 3 | 72.9 | 86.3 |
| 29 <sup>[c]</sup>   | FeCl <sub>2</sub> /Cs <sub>2</sub> CO <sub>3</sub> | toluene | 80 | 3 | 27.8 | 85.7 |
| 30 <sup>[c]</sup>   | FeSO <sub>4</sub> ·7H <sub>2</sub> O/TBAC          | toluene | 80 | 3 | 80.5 | 88.3 |
| 31 <sup>[c]</sup>   | FeCl <sub>2</sub> /NaCl                            | toluene | 80 | 3 | 27.8 | 85.7 |
| 32 <sup>[c]</sup>   | FeCl <sub>2</sub> /NH <sub>4</sub> Cl              | toluene | 80 | 3 | 80.5 | 88.3 |
| 33 <sup>[c,d]</sup> | FeCl <sub>2</sub> /TBAC                            | toluene | 80 | 3 | >99  | 95.5 |

[a] Reaction conditions: **1a** 0.5 mmol, catalyst 50 mol%, reaction time 10 h, solvent 2 mL, oxygen atmosphere. [b] Based on the GC-MS analysis, and the by-products were not quantified. [c] The amount of additive was 5 mol% of the substrate. [d] 12 h.

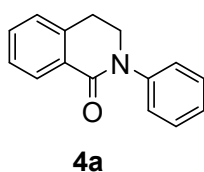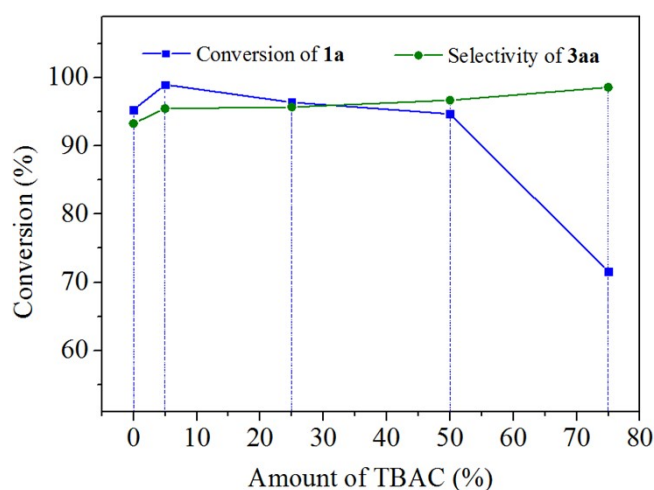

**Fig. S2.** Effect of the amount of TBAC on the reaction

Reaction conditions: **1a** 0.5 mmol, **2a** 1.5 mmol, FeCl<sub>2</sub> 50 mol%, toluene 2 mL, 12 h, oxygen atmosphere. The conversion and selectivity were calculated based on GC-MS analysis.

**Table S2.** The reaction results for some substrates with or without of TBAC.<sup>[a]</sup>

| Entry | <b>1</b>                                                                                         | <b>3</b>                                                                                          | Yield (without of TBAC <sup>[b]</sup> ) /% | Yield (with TBAC <sup>[b]</sup> ) /% |
|-------|--------------------------------------------------------------------------------------------------|---------------------------------------------------------------------------------------------------|--------------------------------------------|--------------------------------------|
| 1     | 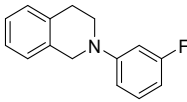<br><b>1n</b>   | <br><b>3na</b>   | 23                                         | 62                                   |
| 2     | <br><b>1b</b>   | <br><b>3ba</b>   | 34                                         | 78                                   |
| 3     | <br><b>1m</b>   | <br><b>3ma</b>   | 52                                         | 72                                   |
| 4     | <br><b>1k</b>  | <br><b>3ka</b>  | 42                                         | 47                                   |
| 5     | <br><b>1q</b> | <br><b>3qa</b> | 38                                         | 78                                   |

[a] Reaction conditions: **1** 0.5 mmol, **2a** 1.5 mmol, FeCl<sub>2</sub> 50 mol%, 24 h, toluene 2 mL, oxygen atmosphere, TBAC 5 mol%.

[b] Based on the GC-MS analysis, and the by-products were not quantified.



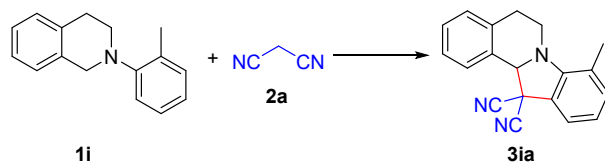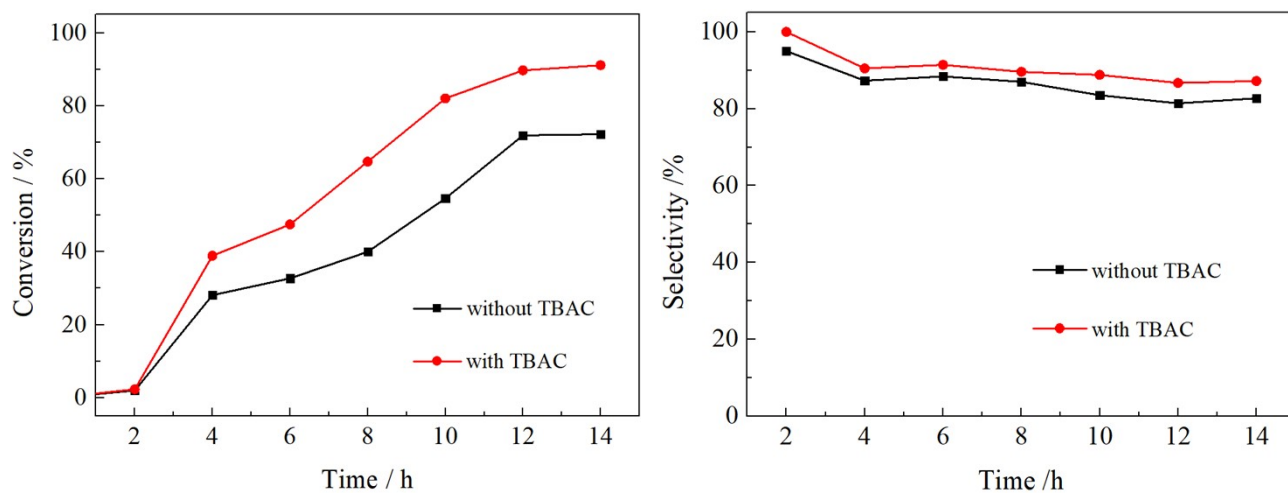

**Fig. S3.** The catalytic results between **1i** and **2a** with or without TBAC

Reaction conditions: **1i** 0.5 mmol, **2a** 1.5 mmol, FeCl<sub>2</sub> 50 mol%, toluene 2 mL, oxygen atmosphere, TBAC 5 mol%. The conversion and selectivity were calculated based on the GC-MS analysis.

## ESI-MS spectra of iminium intermediate

To demonstrate the possibility of the formation of iminium intermediate, the reaction was performed in the presence of  $\text{FeCl}_2$  without a nucleophile, and the filtrate was analyzed by MS with ESI ion source (Finnigan TSQ Quantum Mass Spectrometer). The iminium could be obviously observed at 208.1 (Fig. S4).

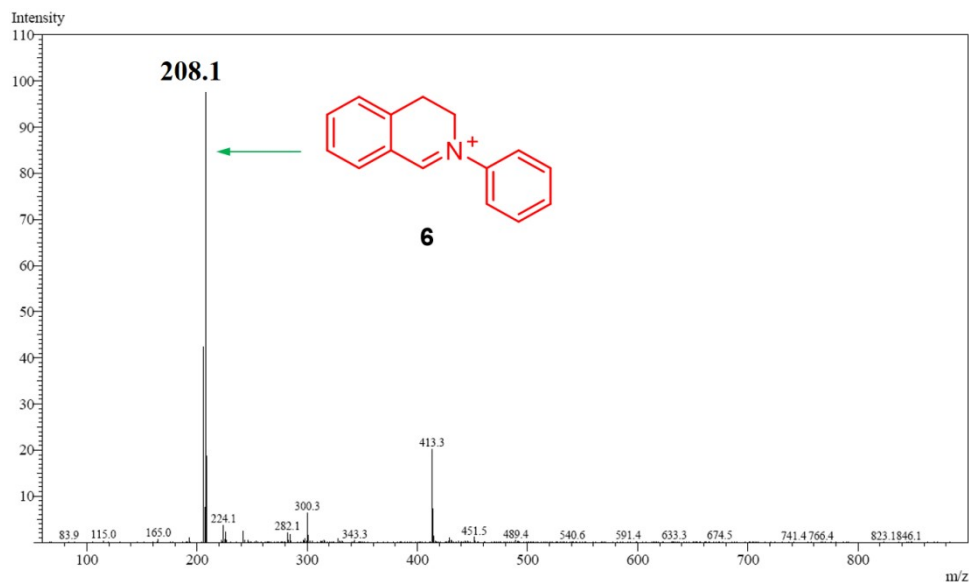

**Fig. S4.** The MS-ESI spectra for the possible iminium intermediate.

## Spectrometric data for the products:

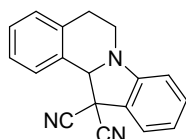

5,12a-Dihydroindolo[2,1-*a*]isoquinoline-12,12(6*H*)-dicarbonitrile (**3aa**): White solid, mp. 60.5 – 62.0 °C. **<sup>1</sup>H NMR** (300 MHz, CDCl<sub>3</sub>) δ 7.62 – 7.56 (m, 1H), 7.51 (dd, *J* = 7.6, 0.7 Hz, 1H), 7.42 – 7.32 (m, 3H), 7.29 – 7.24 (m, 1H), 6.93 (td, *J* = 7.6, 0.8 Hz, 1H), 6.76 (d, *J* = 8.0 Hz, 1H), 5.20 (s, 1H), 3.93 – 3.78 (m, 1H), 3.28 – 3.12 (m, 2H), 2.96 – 2.82 (m, 1H). **<sup>13</sup>C NMR** (126 MHz, CDCl<sub>3</sub>) δ 149.6, 135.6, 132.2, 129.8, 129.7, 129.0, 127.3, 125.6, 125.0, 122.0, 120.5, 115.1, 112.2, 109.6, 77.5, 77.1, 76.6, 72.0, 42.6, 42.5, 28.8. **HRMS** (ESI-TOF) Calcd. for C<sub>18</sub>H<sub>13</sub>N<sub>3</sub> [M+H]<sup>+</sup> 272.1182, found 272.1179.

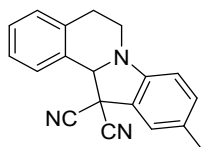

10-Methyl-5,12a-dihydroindolo[2,1-*a*]isoquinoline-12,12(6*H*)-dicarbonitrile (**3ba**): Orange oil. **<sup>1</sup>H NMR** (500 MHz, CDCl<sub>3</sub>) δ 7.65 (d, *J* = 7.2 Hz, 1H), 7.44 – 7.36 (m, 2H), 7.29 – 7.26 (m, 2H), 6.73 (d, *J* = 7.6 Hz, 1H), 6.64 (d, *J* = 8.0 Hz, 1H), 5.33 (s, 1H), 3.84 (ddd, *J* = 12.0, 5.6, 2.4 Hz, 1H), 3.29 – 3.22 (m, 1H), 3.17 (ddd, *J* = 16.6, 11.1, 5.7 Hz, 1H), 2.94 – 2.87 (m, 1H), 2.59 (s, 3H). **<sup>13</sup>C NMR** (75 MHz, CDCl<sub>3</sub>) δ 147.7, 135.7, 132.7, 130.8, 129.9, 129.6, 128.9, 127.2, 125.6, 125.3, 122.4, 115.3, 112.4, 110.2, 72.3, 43.3, 42.7, 28.8, 20.8. **HRMS** (ESI-TOF) Calcd. for C<sub>19</sub>H<sub>15</sub>N<sub>3</sub> [M+H]<sup>+</sup> 286.1339, found 286.1332.

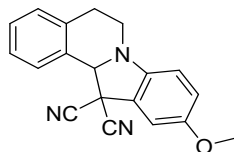

10-Methoxy-5,12a-dihydroindolo[2,1-*a*]isoquinoline-12,12(6*H*)-dicarbonitrile (**3ca**): Yellow oil. **<sup>1</sup>H NMR** (500 MHz, CDCl<sub>3</sub>) δ 7.64 (d, *J* = 7.4 Hz, 1H), 7.37 (ddd, *J* = 21.1, 16.0, 7.7 Hz, 3H), 7.29 (s, 1H), 6.45 (d, *J* = 8.3 Hz, 1H), 6.40 (d, *J* = 8.0 Hz, 1H), 5.37 (s, 1H), 3.99 (s, 3H), 3.83 (ddd, *J* = 12.3, 5.7, 2.4 Hz, 1H), 3.27 (td, *J* = 11.8, 3.6 Hz, 1H), 3.14 (ddd, *J* = 16.6, 11.3, 5.7 Hz, 1H), 2.88 (d, *J* = 15.9 Hz, 1H). **<sup>13</sup>C NMR** (126 MHz, CDCl<sub>3</sub>) δ 157.0, 151.5, 135.7, 133.8, 130.0, 129.5, 128.9, 127.3, 125.9, 114.9, 111.8, 107.7, 103.0, 102.5, 72.2, 56.0, 43.1, 40.8, 28.9. **HRMS** (ESI-TOF) Calcd. for C<sub>19</sub>H<sub>15</sub>N<sub>3</sub>O [M+H]<sup>+</sup> 302.1288, found 302.1281.

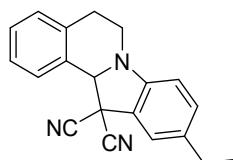

10-ethyl-5,12a-dihydroindolo[2,1-*a*]isoquinoline-12,12(6*H*)-dicarbonitrile (**3da**): Yellow oil. **<sup>1</sup>H NMR** (500 MHz, CDCl<sub>3</sub>) δ 7.71 – 7.60 (m, 1H), 7.47 – 7.32 (m, 3H), 7.32 – 7.28 (m, 1H), 6.80 (ddd, *J* = 27.5, 14.3, 4.6 Hz, 1H), 6.64 (d, *J* = 7.7 Hz, 1H), 5.26 (d, *J* = 44.0 Hz, 1H), 3.93 – 3.81 (m, 1H), 3.29 – 3.13 (m, 2H), 3.02 – 2.89 (m, 2H), 2.72 – 2.65 (m, 1H), 1.42 (d, *J* = 7.5 Hz, 1H), 1.29 (q, *J* = 7.6 Hz, 2H). **<sup>13</sup>C NMR** (126 MHz, CDCl<sub>3</sub>) δ 150.0, 142.5, 135.8, 132.3, 131.6, 130.0, 129.6, 128.9, 127.3, 127.2, 127.2, 125.7, 125.6, 125.6, 124.7, 124.2, 120.5, 120.4, 115.5, 112.1, 110.2, 109.3, 107.3, 72.3, 71.9, 43.2, 42.9, 42.6, 29.4, 28.9, 28.8, 28.8, 24.9, 15.6, 14.1. **HRMS** (ESI-TOF) Calcd. for C<sub>20</sub>H<sub>17</sub>N<sub>3</sub> [M+H]<sup>+</sup> 300.1495, found 300.1491.

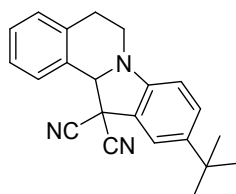

10-(*tert*-Butyl)-5,12a-dihydroindolo[2,1-*a*]isoquinoline-12,12(6*H*)-dicarbonitrile (**3ea**): Red-brown oil.  $^1\text{H NMR}$  (500 MHz,  $\text{CDCl}_3$ )  $\delta$  7.65 – 7.60 (m, 1H), 7.64 – 7.61 (m, 1H), 7.55 (d,  $J = 1.9$  Hz, 1H), 7.55 (d,  $J = 1.9$  Hz, 1H), 7.45 – 7.37 (m, 3H), 7.29 (s, 1H), 6.76 (d,  $J = 8.4$  Hz, 1H), 5.22 (s, 1H), 3.87 – 3.81 (m, 1H), 3.27 – 3.16 (m, 2H), 2.95 – 2.89 (m, 1H), 1.36 (s, 9H).  $^{13}\text{C NMR}$  (126 MHz,  $\text{CDCl}_3$ )  $\delta$  147.6, 144.6, 135.7, 129.9, 129.6, 129.2, 128.9, 127.2, 125.7, 122.0, 121.6, 115.3, 112.5, 109.8, 72.4, 43.2, 42.9, 34.6, 31.5, 28.8. **HRMS** (ESI-TOF) Calcd. for  $\text{C}_{22}\text{H}_{21}\text{N}_3$   $[\text{M}+\text{H}]^+$  328.1808, found 328.1803.

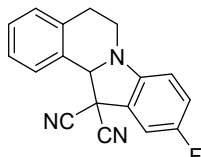

10-Fluoro-5,12a-dihydroindolo[2,1-*a*]isoquinoline-12,12(6*H*)-dicarbonitrile (**3fa**): Yellow oil.  $^1\text{H NMR}$  (500 MHz,  $\text{CDCl}_3$ )  $\delta$  7.62 – 7.58 (m, 1H), 7.41 (pd,  $J = 7.4, 1.7$  Hz, 2H), 7.31 (dd,  $J = 7.1, 2.5$  Hz, 2H), 7.14 (td,  $J = 8.7, 2.6$  Hz, 1H), 6.77 (dd,  $J = 8.7, 4.0$  Hz, 1H), 5.26 (s, 1H), 3.80 (ddd,  $J = 7.5, 5.0, 2.9$  Hz, 1H), 3.22 (dtd,  $J = 16.2, 10.7, 4.6$  Hz, 2H), 2.97 – 2.91 (m, 1H).  $^{13}\text{C NMR}$  (126 MHz,  $\text{CDCl}_3$ )  $\delta$  158.2, 156.3, 146.4, 135.5, 129.7, 129.5, 129.1, 127.3, 125.6, 123.1 (d,  $J_{\text{C-F}} = 8.4$  Hz), 119.2–119.0 (d,  $J_{\text{C-F}} = 23.4$  Hz), 114.6, 112.7–112.5 (d,  $J_{\text{C-F}} = 26.0$  Hz), 111.0 (d,  $J_{\text{C-F}} = 7.8$  Hz), 72.6, 43.4, 28.7. **HRMS** (ESI-TOF) Calcd. for  $\text{C}_{18}\text{H}_{12}\text{FN}_3$   $[\text{M}+\text{H}]^+$  290.1088, found 290.1079.

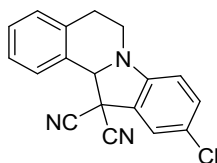

10-Chloro-5,12a-dihydroindolo[2,1-*a*]isoquinoline-12,12(6*H*)-dicarbonitrile (**3ga**): Yellow oil.  $^1\text{H NMR}$  (500 MHz,  $\text{CDCl}_3$ )  $\delta$  7.61 – 7.57 (m, 1H), 7.52 (d,  $J = 1.9$  Hz, 1H), 7.44 – 7.37 (m, 2H), 7.36 (dd,  $J = 8.5, 1.9$  Hz, 1H), 7.32 – 7.28 (m, 1H), 6.72 (d,  $J = 8.5$  Hz, 1H), 5.27 (s, 1H), 3.87 – 3.82 (m, 1H), 3.29 – 3.16 (m, 2H), 2.95 – 2.90 (m, 1H).  $^{13}\text{C NMR}$  (126 MHz,  $\text{CDCl}_3$ )  $\delta$  148.2, 135.4, 132.3, 129.7, 129.3, 127.4, 125.6, 125.0, 123.1, 114.5, 111.7, 110.5, 72.1, 42.5, 28.7. **HRMS** (ESI-TOF) Calcd. for  $\text{C}_{18}\text{H}_{12}\text{ClN}_3$   $[\text{M}+\text{H}]^+$  306.0793, found 306.0786.

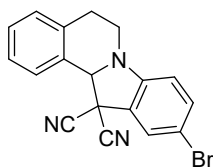

10-Bromo-5,12a-dihydroindolo[2,1-*a*]isoquinoline-12,12(6*H*)-dicarbonitrile (**3ha**): Yellow oil.  $^1\text{H NMR}$  (500 MHz,  $\text{CDCl}_3$ )  $\delta$  7.65 (d,  $J = 1.9$  Hz, 1H), 7.60 – 7.57 (m, 1H), 7.49 (dd,  $J = 8.5, 1.9$  Hz, 1H), 7.44 – 7.37 (m, 2H), 7.31 (s, 1H), 6.67 (d,  $J = 8.5$  Hz, 1H), 5.27 (s, 1H), 3.87 – 3.82 (m, 1H), 3.29 – 3.16 (m, 2H), 2.95 – 2.89 (m, 1H).  $^{13}\text{C NMR}$  (126 MHz,  $\text{CDCl}_3$ )  $\delta$  148.5, 135.4, 135.1, 129.7, 129.2, 127.9, 127.4, 125.6, 123.5, 114.4, 111.6, 110.9, 72.0, 42.5, 28.7. **HRMS** (ESI-TOF) Calcd. for  $\text{C}_{18}\text{H}_{12}\text{BrN}_3$   $[\text{M}+\text{H}]^+$  350.0287, found 350.0282.

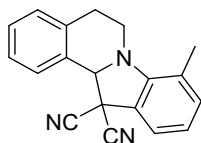

8-Methyl-5,12a-dihydroindolo[2,1-*a*]isoquinoline-12,12(6*H*)-dicarbonitrile (**3ia**): Yellow solid, mp. 126.5 – 141.5 °C. **<sup>1</sup>H NMR** (500 MHz, CDCl<sub>3</sub>) δ 7.65 (d, *J* = 7.2 Hz, 1H), 7.50 – 7.37 (m, 3H), 7.30 (s, 1H), 6.73 (d, *J* = 7.6 Hz, 1H), 6.64 (d, *J* = 8.0 Hz, 1H), 5.33 (s, 1H), 3.84 (ddd, *J* = 12.0, 5.7, 2.4 Hz, 1H), 3.29 – 3.23 (m, 1H), 3.17 (ddd, *J* = 16.7, 11.4, 5.7 Hz, 1H), 2.93 – 2.88 (m, 1H). **<sup>13</sup>C NMR** (126 MHz, CDCl<sub>3</sub>) δ 150.1, 136.6, 135.7, 132.1, 129.9, 129.6, 128.9, 127.3, 125.7, 122.5, 115.1, 111.7, 107.5, 71.8, 43.0, 42.0, 28.8, 18.2. **HRMS** (ESI-TOF): Calcd. for C<sub>19</sub>H<sub>15</sub>N<sub>3</sub> [M+H]<sup>+</sup> 286.1339, found 286.1332.

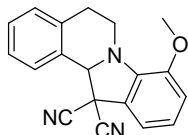

8-Methoxy-5,12a-dihydroindolo[2,1-*a*]isoquinoline-12,12(6*H*)-dicarbonitrile (**3ja**): Yellow oil. **<sup>1</sup>H NMR** (500 MHz, CDCl<sub>3</sub>) δ 7.64 (d, *J* = 7.4 Hz, 1H), 7.43 – 7.28 (m, 4H), 6.45 (d, *J* = 8.3 Hz, 1H), 6.40 (d, *J* = 8.0 Hz, 1H), 5.37 (s, 1H), 3.99 (s, 3H), 3.83 (ddd, *J* = 12.3, 5.8, 2.4 Hz, 1H), 3.30 – 3.24 (m, 1H), 3.14 (ddd, *J* = 16.5, 11.3, 5.7 Hz, 1H), 2.88 (dt, *J* = 16.0, 2.8 Hz, 1H). **<sup>13</sup>C NMR** (126 MHz, CDCl<sub>3</sub>) δ 157.0, 151.5, 133.8, 129.5, 128.9, 127.3, 125.8, 114.9, 111.9, 107.6, 103.0, 102.5, 72.2, 56.0, 43.1, 40.8, 28.9. **HRMS** (ESI-TOF) Calcd. for C<sub>19</sub>H<sub>15</sub>N<sub>3</sub>O [M+H]<sup>+</sup> 302.1288, found 302.1288.

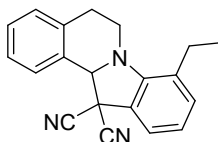

8-Ethyl-5,12a-dihydroindolo[2,1-*a*]isoquinoline-12,12(6*H*)-dicarbonitrile (**3ka**): Yellow oil. **<sup>1</sup>H NMR** (500 MHz, CDCl<sub>3</sub>) δ 7.71 – 7.61 (m, 1H), 7.48 – 7.34 (m, 3H), 7.32 – 7.28 (m, 1H), 6.84 – 6.78 (m, 1H), 6.65 (d, *J* = 8.0 Hz, 1H), 5.26 (d, *J* = 44.1 Hz, 1H), 3.93 – 3.83 (m, 1H), 3.29 – 3.13 (m, 2H), 3.00 – 2.88 (m, 2H), 2.70 (q, *J* = 7.6 Hz, 1H), 1.43 (t, *J* = 7.6 Hz, 2H), 1.31 (d, *J* = 7.6 Hz, 1H). **<sup>13</sup>C NMR** (126 MHz, CDCl<sub>3</sub>) δ 150.0, 149.8, 149.3, 142.5, 135.8, 135.7, 132.3, 130.0, 129.9, 128.9, 128.9, 127.2, 127.2, 125.7, 124.7, 120.5, 120.4, 119.5, 119.4, 115.5, 115.2, 112.4, 112.1, 109.3, 107.3, 72.3, 71.9, 42.9, 42.6, 29.4, 28.9, 24.9, 15.6, 14.1. **HRMS** (ESI-TOF) Calcd. for C<sub>20</sub>H<sub>17</sub>N<sub>3</sub> [M+H]<sup>+</sup> 300.1495, found 300.1485.

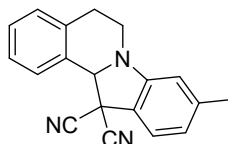

9-methyl-5,12a-dihydroindolo[2,1-*a*]isoquinoline-12,12(6*H*)-dicarbonitrile (**3la**): Yellow solid, mp. 127.8-129.1 °C. **<sup>1</sup>H NMR** (500 MHz, CDCl<sub>3</sub>) δ 7.66 (d, *J* = 7.2 Hz, 1H), 7.41 (dd, *J* = 7.9, 6.2 Hz, 3H), 7.30 (s, 1H), 6.73 (d, *J* = 7.6 Hz, 1H), 6.64 (d, *J* = 8.0 Hz, 1H), 5.33 (s, 1H), 3.84 (ddd, *J* = 11.9, 5.7, 2.4 Hz, 2H), 3.27 (dd, *J* = 11.4, 3.7 Hz, 1H), 2.92 (s, 1H), 2.59 (s, 4H). **<sup>13</sup>C NMR** (126 MHz, CDCl<sub>3</sub>) δ 150.1, 136.6, 135.8, 132.1, 130.0, 129.6, 128.9, 127.3, 125.7, 122.5, 115.1, 111.7, 107.5, 71.8, 43.0, 42.0, 28.8, 18.2. **HRMS** (ESI-TOF) Calcd. for C<sub>19</sub>H<sub>15</sub>N<sub>3</sub> [M+H]<sup>+</sup> 286.1339, found 286.1334.

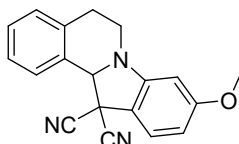

9-methoxy-5,12a-dihydroindolo[2,1-*a*]isoquinoline-12,12(6*H*)-dicarbonitrile (**3ma**): Orange oil. **<sup>1</sup>H NMR** (500 MHz, CDCl<sub>3</sub>) δ 7.62 – 7.59 (m, 1H), 7.40 (ddd, *J* = 9.1, 7.9, 4.9 Hz, 3H), 7.29 (t, *J* = 3.4 Hz, 1H), 6.47 (dd, *J* = 8.4, 2.3 Hz, 1H), 6.31 (d, *J* = 2.3 Hz, 1H), 5.24 (s, 1H), 3.86 – 3.83 (m, 4H), 3.27 – 3.16 (m, 2H), 2.91 (dd, *J* = 12.6, 1.9 Hz, 1H). **<sup>13</sup>C NMR** (126 MHz, CDCl<sub>3</sub>) δ 163.5, 151.0, 129.6, 128.9, 127.2, 125.7, 125.5, 115.2, 113.9, 112.5, 105.4, 96.2, 72.4, 55.7, 42.4, 42.2, 28.8. **HRMS** (ESI-TOF) Calcd. for C<sub>19</sub>H<sub>15</sub>N<sub>3</sub>O [M+H]<sup>+</sup> 302.1288, found 302.1284.

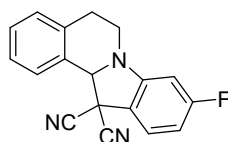

9-fluoro-5,12a-dihydroindolo[2,1-*a*]isoquinoline-12,12(6*H*)-dicarbonitrile (**3na**): Orange oil.  $^1\text{H NMR}$  (500 MHz,  $\text{CDCl}_3$ )  $\delta$  7.62 (d,  $J = 7.0$  Hz, 1H), 7.44 – 7.35 (m, 3H), 7.30 (d,  $J = 7.0$  Hz, 1H), 6.63 (t,  $J = 8.6$  Hz, 1H), 6.56 (d,  $J = 8.0$  Hz, 1H), 5.41 (s, 1H), 3.88 (ddd,  $J = 12.3, 5.8, 2.1$  Hz, 1H), 3.34 – 3.27 (m, 1H), 3.18 (ddd,  $J = 16.8, 11.4, 5.7$  Hz, 1H), 2.91 (d,  $J = 15.9$  Hz, 1H).  $^{13}\text{C NMR}$  (126 MHz,  $\text{CDCl}_3$ )  $\delta$  135.5, 134.4 (d,  $J_{\text{C-F}} = 9.1$  Hz), 129.7, 129.2 (d,  $J_{\text{C-F}} = 6.0$  Hz), 127.5, 125.7, 113.9, 111.0, 107.3, 107.3-107.2 (d,  $J_{\text{C-F}} = 19.1$  Hz), 105.2, 72.3, 42.7, 29.7, 28.8. **HRMS** (ESI-TOF) Calcd. for  $\text{C}_{18}\text{H}_{12}\text{FN}_3$   $[\text{M}+\text{H}]^+$  290.1088, found 290.1085.

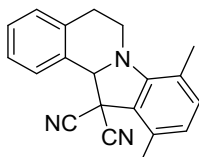

8,11-Dimethyl-5,12a-dihydroindolo[2,1-*a*]isoquinoline-12,12(6*H*)-dicarbonitrile (**3oa**): White solid, mp. 146.8 – 148.0°C.  $^1\text{H NMR}$  (500 MHz,  $\text{CDCl}_3$ )  $\delta$  7.77 – 7.74 (m, 1H), 7.44 – 7.40 (m, 2H), 7.35 – 7.32 (m, 1H), 7.19 (d,  $J = 7.7$  Hz, 1H), 6.94 (d,  $J = 7.7$  Hz, 1H), 5.49 (s, 1H), 3.44 (dt,  $J = 11.4, 4.5$  Hz, 1H), 3.27 – 3.20 (m, 1H), 3.14 (ddd,  $J = 14.7, 10.0, 4.4$  Hz, 1H), 2.94 (dt,  $J = 15.8, 3.8$  Hz, 1H), 2.59 (s, 3H), 2.37 (s, 3H).  $^{13}\text{C NMR}$  (126 MHz,  $\text{CDCl}_3$ )  $\delta$  152.3, 135.7, 133.9, 133.6, 129.7, 129.1, 129.0, 127.4, 126.7, 126.6, 125.7, 125.2, 115.9, 113.0, 71.7, 46.3, 43.8, 29.8, 18.3, 17.3. **HRMS** (ESI-TOF) Calcd. for  $\text{C}_{20}\text{H}_{17}\text{N}_3$   $[\text{M}+\text{H}]^+$  300.1495, found 300.1491.

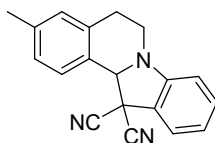

3-Methyl-5,12a-dihydroindolo[2,1-*a*]isoquinoline-12,12(6*H*)-dicarbonitrile (**3pa**): Yellow solid, mp. 121.5 – 134.0 °C.  $^1\text{H NMR}$  (500 MHz,  $\text{CDCl}_3$ )  $\delta$  7.52 (dd,  $J = 17.7, 7.7$  Hz, 2H), 7.39 (dd,  $J = 11.3, 4.2$  Hz, 1H), 7.22 (d,  $J = 7.9$  Hz, 1H), 7.11 (s, 1H), 6.95 (t,  $J = 7.5$  Hz, 1H), 6.79 (d,  $J = 8.0$  Hz, 1H), 5.22 (s, 1H), 3.90 – 3.85 (m, 1H), 3.20 (dtd,  $J = 16.6, 11.3, 4.6$  Hz, 2H), 2.87 (d,  $J = 15.6$  Hz, 1H), 2.40 (s, 3H).  $^{13}\text{C NMR}$  (126 MHz,  $\text{CDCl}_3$ )  $\delta$  149.6, 138.8, 135.5, 132.2, 130.2, 128.1, 126.8, 125.5, 125.0, 122.0, 120.4, 115.1, 112.3, 109.6, 72.0, 42.8, 42.6, 28.7, 21.3. **HRMS** (ESI-TOF) Calcd. for  $\text{C}_{19}\text{H}_{15}\text{N}_3$   $[\text{M}+\text{H}]^+$  286.1339, found 286.1332.

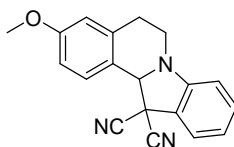

3-Methoxy-5,12a-dihydroindolo[2,1-*a*]isoquinoline-12,12(6*H*)-dicarbonitrile (**3qa**): Yellow oil.  $^1\text{H NMR}$  (500 MHz,  $\text{CDCl}_3$ )  $\delta$  7.53 (d,  $J = 8.2$  Hz, 2H), 7.39 (t,  $J = 7.7$  Hz, 1H), 6.97 – 6.93 (m, 2H), 6.80 (dd,  $J = 10.7, 5.2$  Hz, 2H), 5.21 (s, 1H), 3.87 – 3.84 (m, 4H), 3.26 – 3.13 (m, 2H), 2.90 – 2.83 (m, 1H).  $^{13}\text{C NMR}$  (126 MHz,  $\text{CDCl}_3$ )  $\delta$  159.7, 149.6, 137.3, 132.2, 126.9, 125.0, 122.0, 120.5, 115.2, 114.6, 113.2, 112.4, 109.7, 71.9, 55.3, 43.0, 42.5, 29.1. **HRMS** (ESI-TOF) Calcd. for  $\text{C}_{19}\text{H}_{15}\text{N}_3\text{O}$   $[\text{M}+\text{H}]^+$  302.1288, found 302.285.

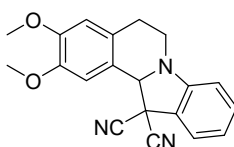

2,3-Dimethoxy-5,12a-dihydroindolo[2,1-*a*]isoquinoline-12,12(6*H*)-dicarbonitrile (**3ra**): Yellow oil. <sup>1</sup>H NMR (500 MHz, CDCl<sub>3</sub>) δ 7.54 – 7.51 (m, 1H), 7.39 (td, *J* = 7.8, 1.1 Hz, 1H), 7.05 (s, 1H), 6.95 (td, *J* = 7.6, 0.7 Hz, 1H), 6.79 (d, *J* = 8.0 Hz, 1H), 6.74 (s, 1H), 5.23 (s, 1H), 3.97 (s, 3H), 3.92 (s, 3H), 3.86 (ddd, *J* = 12.1, 5.7, 2.2 Hz, 1H), 3.27 – 3.20 (m, 1H), 3.13 (ddd, *J* = 16.8, 11.2, 5.7 Hz, 1H), 2.80 (d, *J* = 15.7 Hz, 1H). <sup>13</sup>C NMR (126 MHz, CDCl<sub>3</sub>) δ 149.6, 149.3, 148.2, 132.2, 128.3, 125.0, 121.8, 121.3, 120.4, 115.3, 112.4, 112.0, 109.7, 108.8, 108.1, 71.9, 56.1, 43.1, 42.5, 28.3. HRMS (ESI-TOF) Calcd. for C<sub>20</sub>H<sub>17</sub>N<sub>3</sub>O<sub>2</sub> [M+H]<sup>+</sup> 332.1394, found 332.1394.

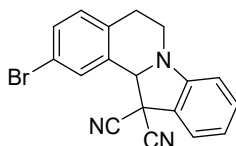

2-bromo-5,12a-dihydroindolo[2,1-*a*]isoquinoline-12,12(6*H*)-dicarbonitrile (**3sa**): Red-brown oil. <sup>1</sup>H NMR (300 MHz, CDCl<sub>3</sub>) δ 7.71 (s, 1H), 7.55 – 7.47 (m, 2H), 7.42 – 7.35 (m, 1H), 7.16 (d, *J* = 8.2 Hz, 1H), 6.96 (t, *J* = 7.2 Hz, 1H), 6.77 (d, *J* = 8.1 Hz, 1H), 5.16 (s, 1H), 3.91 – 3.82 (m, 1H), 3.13 (ddd, *J* = 27.0, 12.2, 4.4 Hz, 2H), 2.86 (d, *J* = 15.3 Hz, 1H). <sup>13</sup>C NMR (126 MHz, CDCl<sub>3</sub>) δ 149.6, 138.8, 135.5, 132.2, 130.2, 128.1, 126.8, 125.5, 124.9, 122.0, 120.4, 115.1, 112.3, 109.6, 72.0, 42.8, 42.6, 28.7, 21.3. HRMS (ESI-TOF) Calcd. for C<sub>18</sub>H<sub>12</sub>BrN<sub>3</sub> [M+H]<sup>+</sup> 350.0287, found 350.0283.

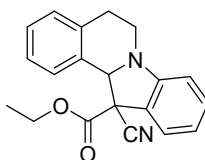

Ethyl 12-cyano-5,6,12,12a-tetrahydroindolo[2,1-*a*]isoquinoline-12-carboxylate (**3ab**): Yellow oil. <sup>1</sup>H NMR (500 MHz, CDCl<sub>3</sub>) δ 7.24 – 7.17 (m, 2H), 7.17 – 7.14 (m, 1H), 7.11 (dd, *J* = 6.7, 1.8 Hz, 2H), 6.72 (t, *J* = 7.3 Hz, 1H), 6.59 (d, *J* = 7.8 Hz, 2H), 4.40 (s, 1H), 3.38 (d, *J* = 17.1 Hz, 1H), 3.33 – 3.27 (m, 2H), 3.02 (d, *J* = 17.1 Hz, 1H), 1.28 (s, 3H), 0.89 (dt, *J* = 19.0, 6.6 Hz, 2H). <sup>13</sup>C NMR (126 MHz, CDCl<sub>3</sub>) δ 146.7, 142.2, 142.1, 135.8, 134.9, 132.3, 129.2, 128.5, 128.1, 126.6, 123.4, 123.2, 119.0, 114.7, 57.0, 54.7, 34.6, 34.3, 29.7. HRMS (ESI-TOF) Calcd. for C<sub>20</sub>H<sub>18</sub>N<sub>2</sub>O<sub>2</sub> [M+H]<sup>+</sup> 319.1441, found 319.1436.

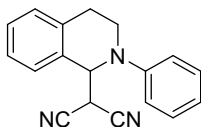

5,6-Dihydroindolo[2,1-*a*]isoquinoline-12-carbonitrile (**4aa**): Yellow oil. <sup>1</sup>H NMR (500 MHz, CDCl<sub>3</sub>) δ 7.50 (d, *J* = 7.3 Hz, 1H), 7.43 – 7.31 (m, 5H), 7.03 (dd, *J* = 15.0, 7.7 Hz, 3H), 5.41 (d, *J* = 4.7 Hz, 1H), 4.24 (d, *J* = 4.7 Hz, 1H), 3.84 (ddd, *J* = 12.3, 7.4, 5.0 Hz, 1H), 3.59 – 3.53 (m, 1H), 3.22 – 3.15 (m, 1H), 3.13 – 3.05 (m, 1H). <sup>13</sup>C NMR (126 MHz, CDCl<sub>3</sub>) δ 140.8, 135.2, 133.1, 129.9, 128.7, 128.4, 127.9, 126.3, 125.7, 123.9, 122.4, 119.5, 117.4, 109.9, 80.6, 40.4, 28.7. HRMS (ESI-TOF) Calcd for C<sub>18</sub>H<sub>15</sub>N<sub>3</sub> [M+H]<sup>+</sup> 274.1339, found 274.1335.

## References

- [1] L. Shi, M. Wang, C.-A. Fan, F.-M. Zhang, Y.-Q. Tu, *Org. Lett.* **2003**, *5*, 3515–3517.
- [2] E. Boess, C. Schmitz, M. Klussmann, *J. Am. Chem. Soc.* **2012**, *134*, 5317–5325.



# NMR spectra

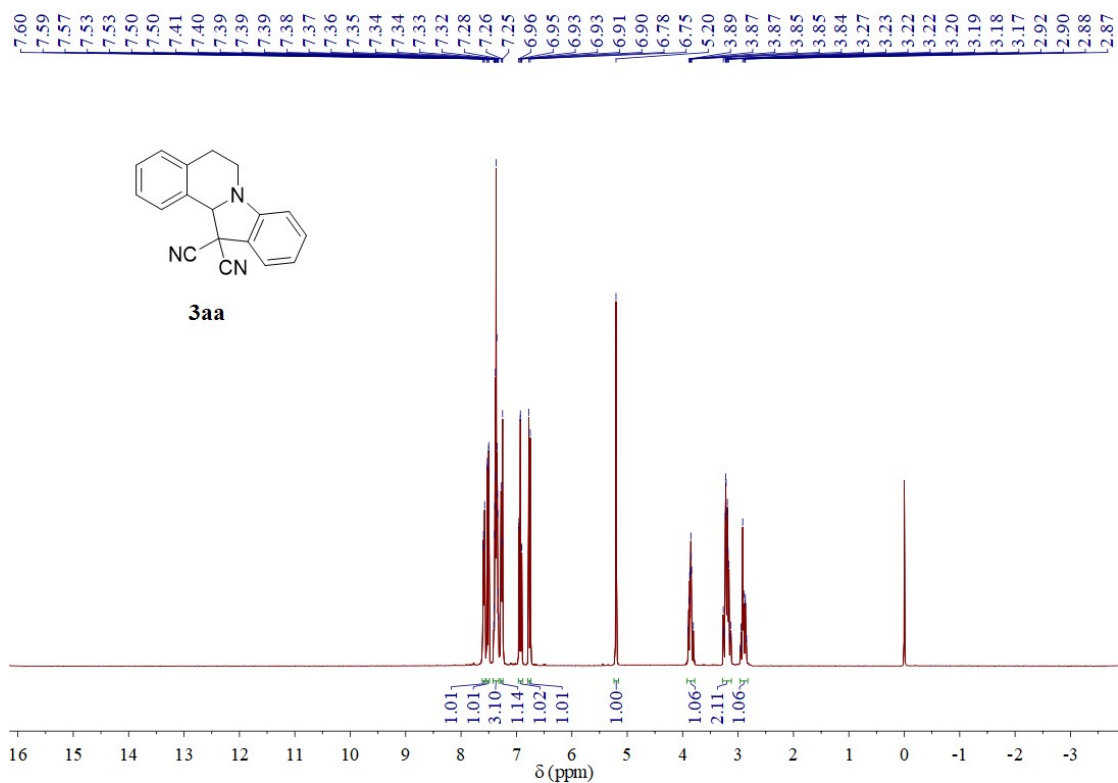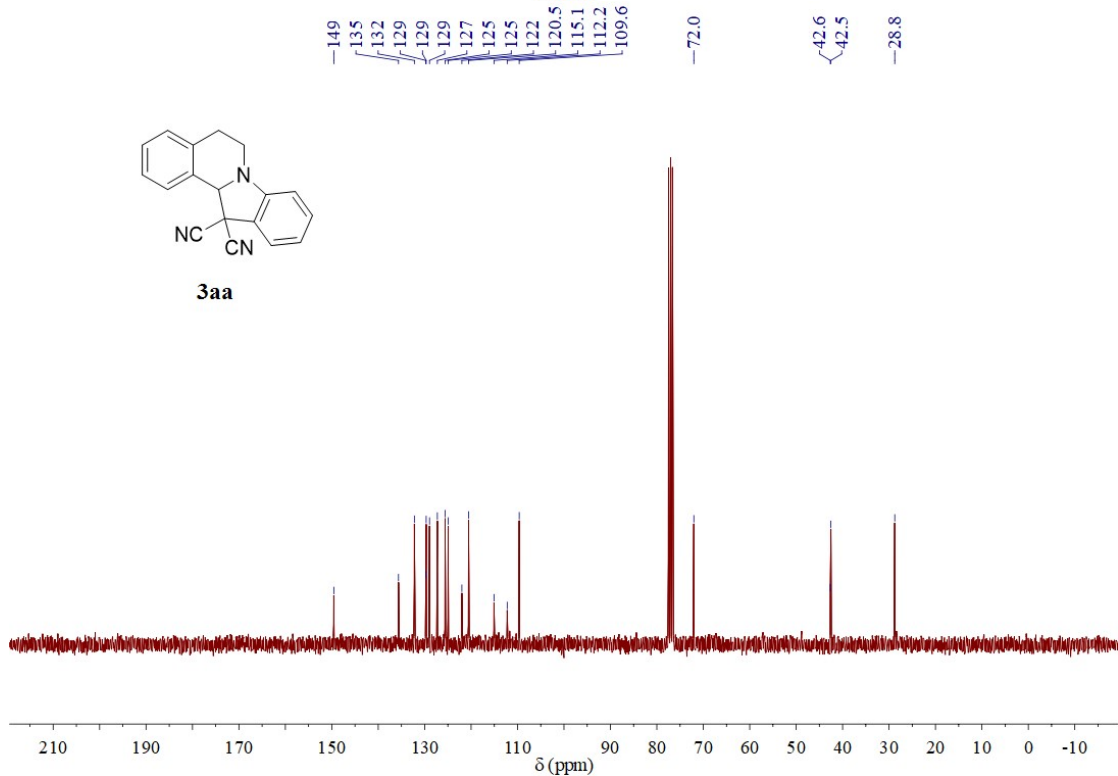

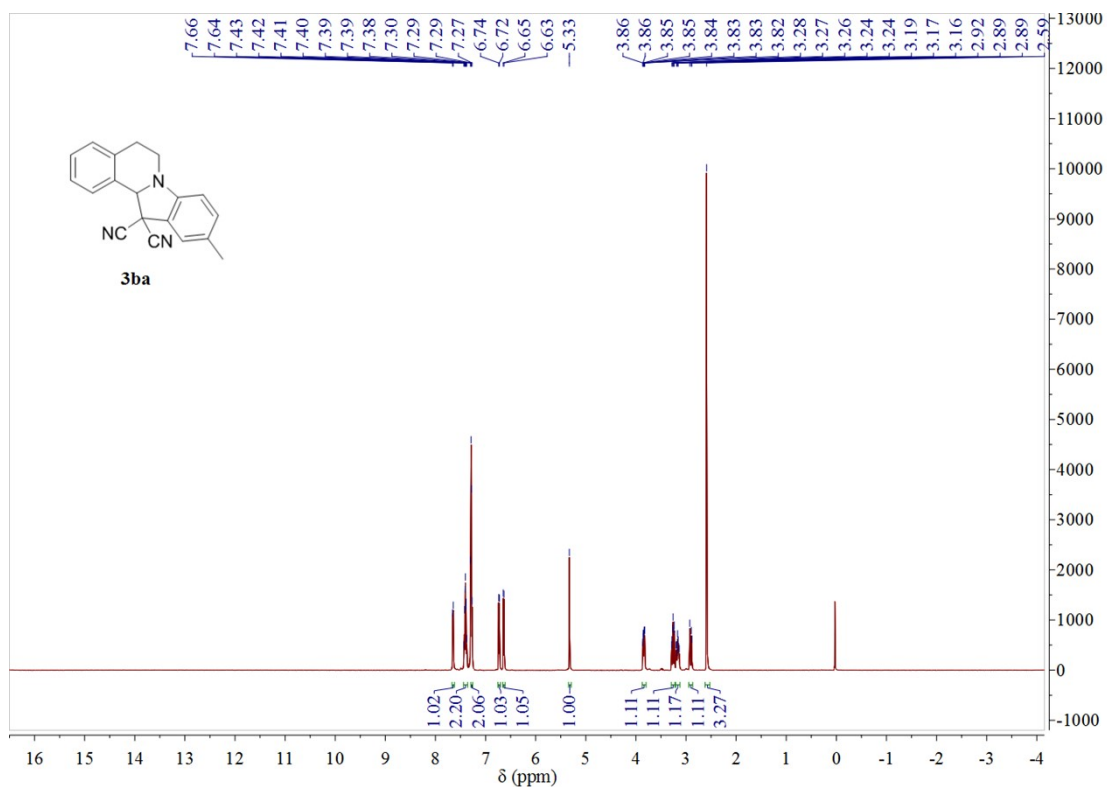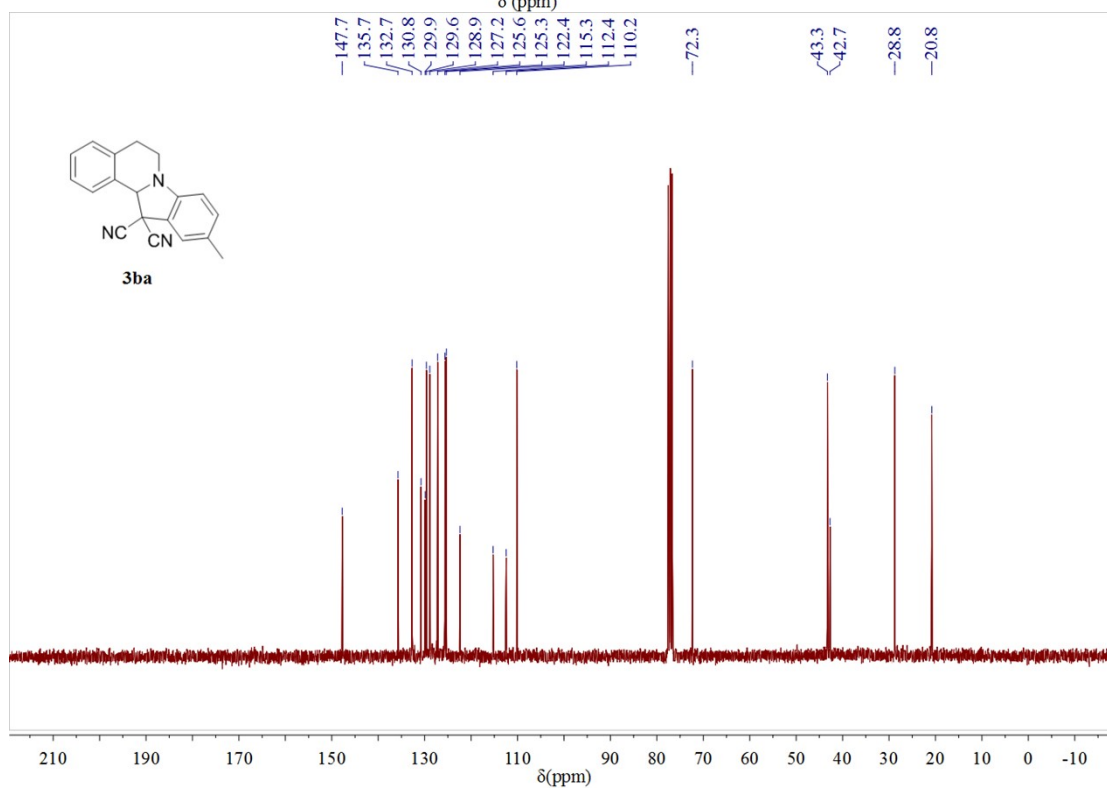

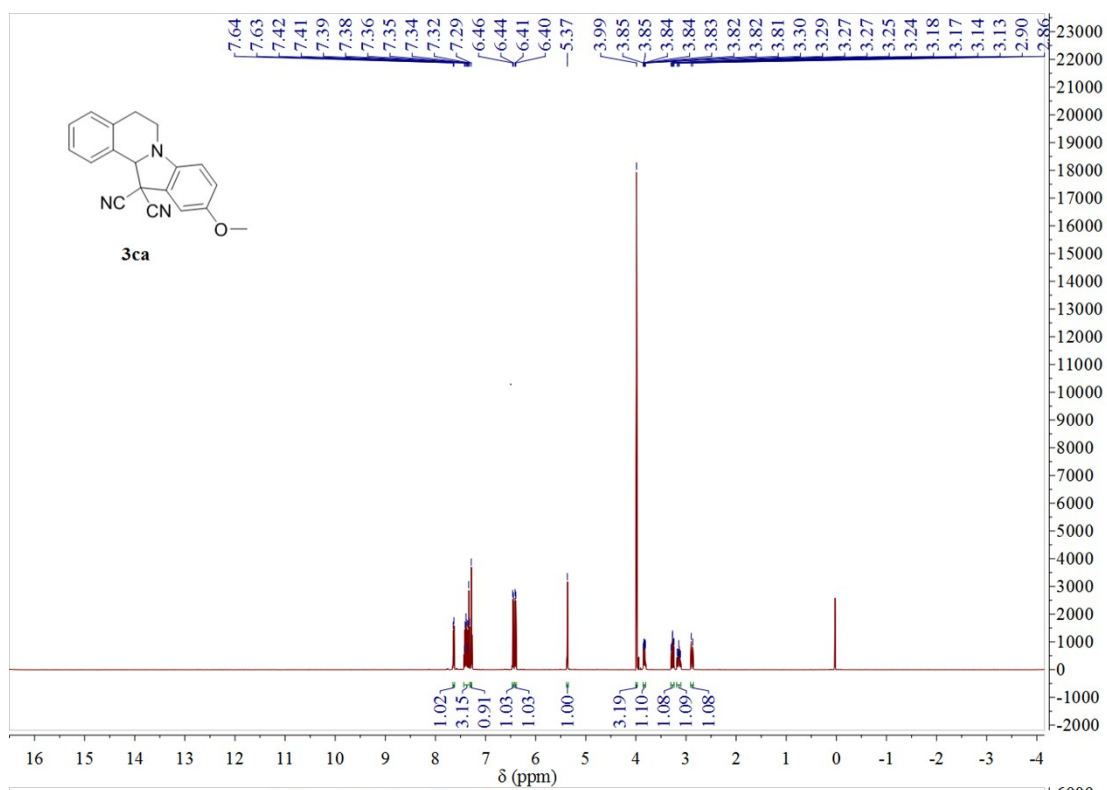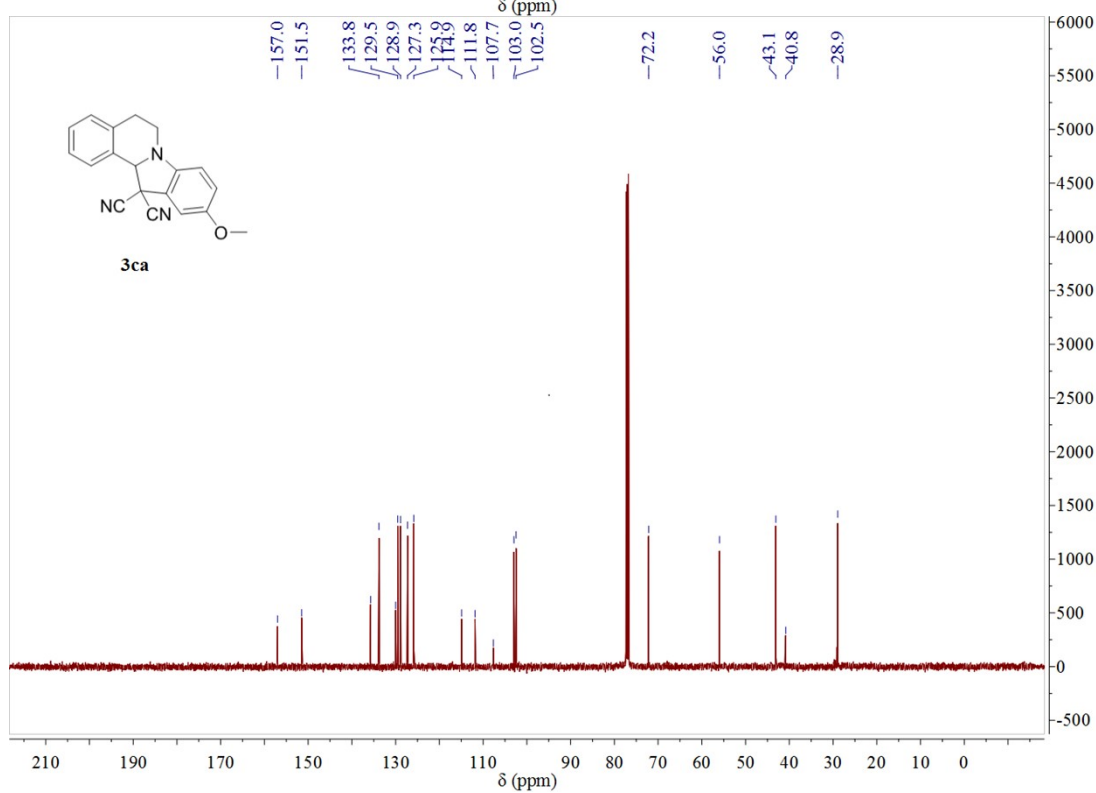

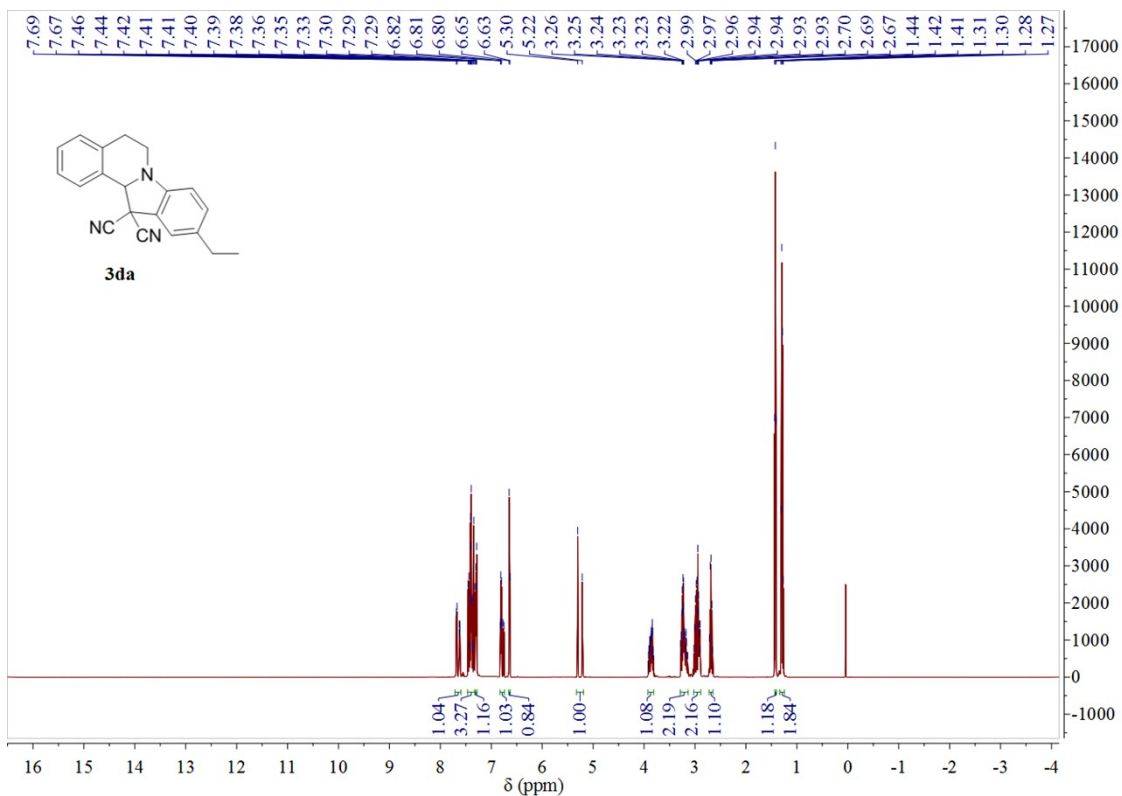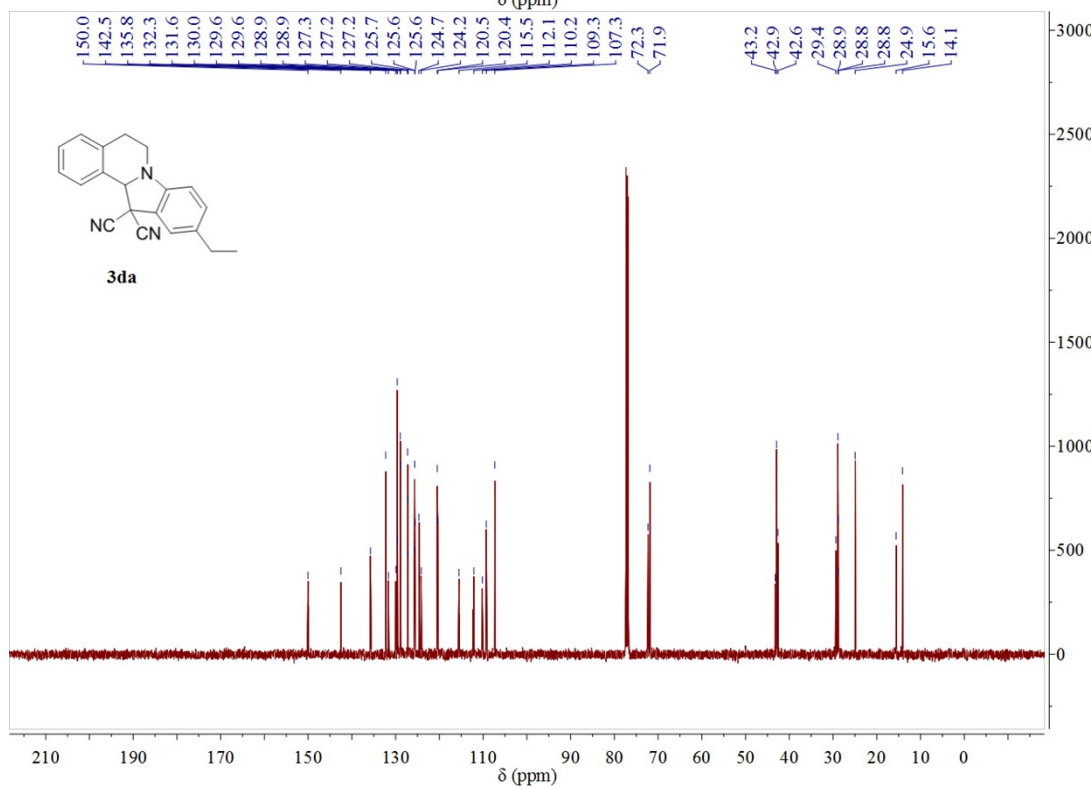

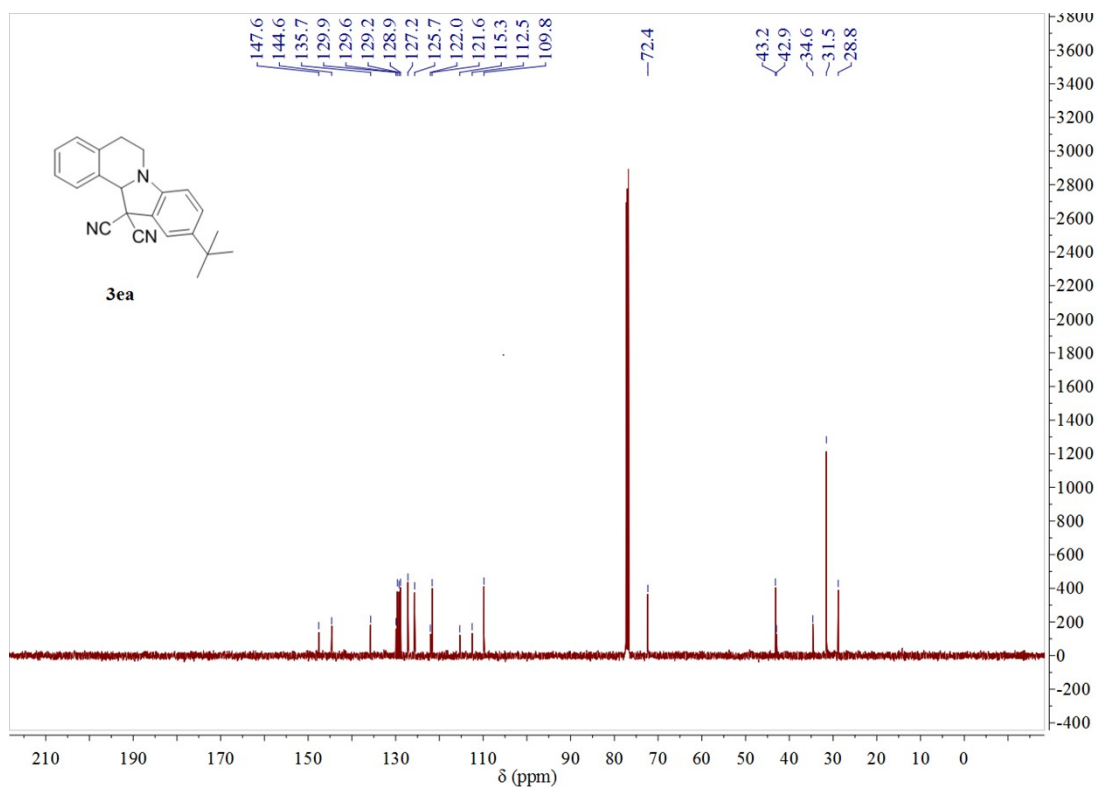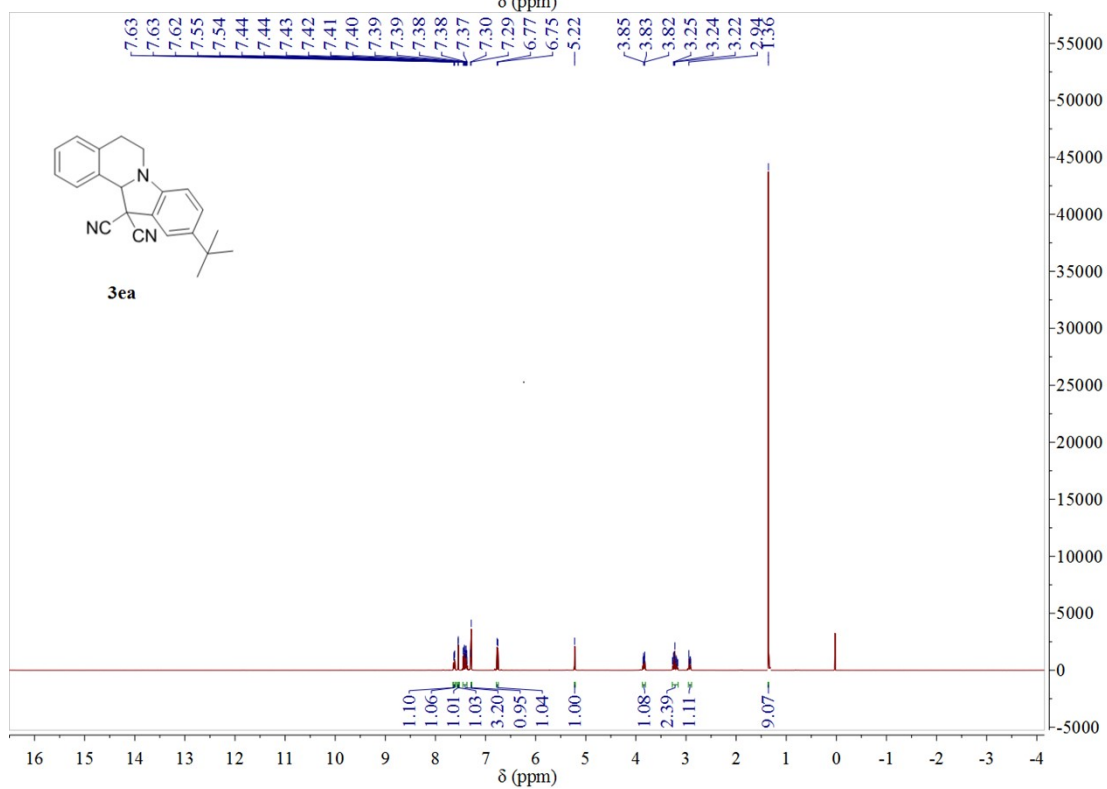

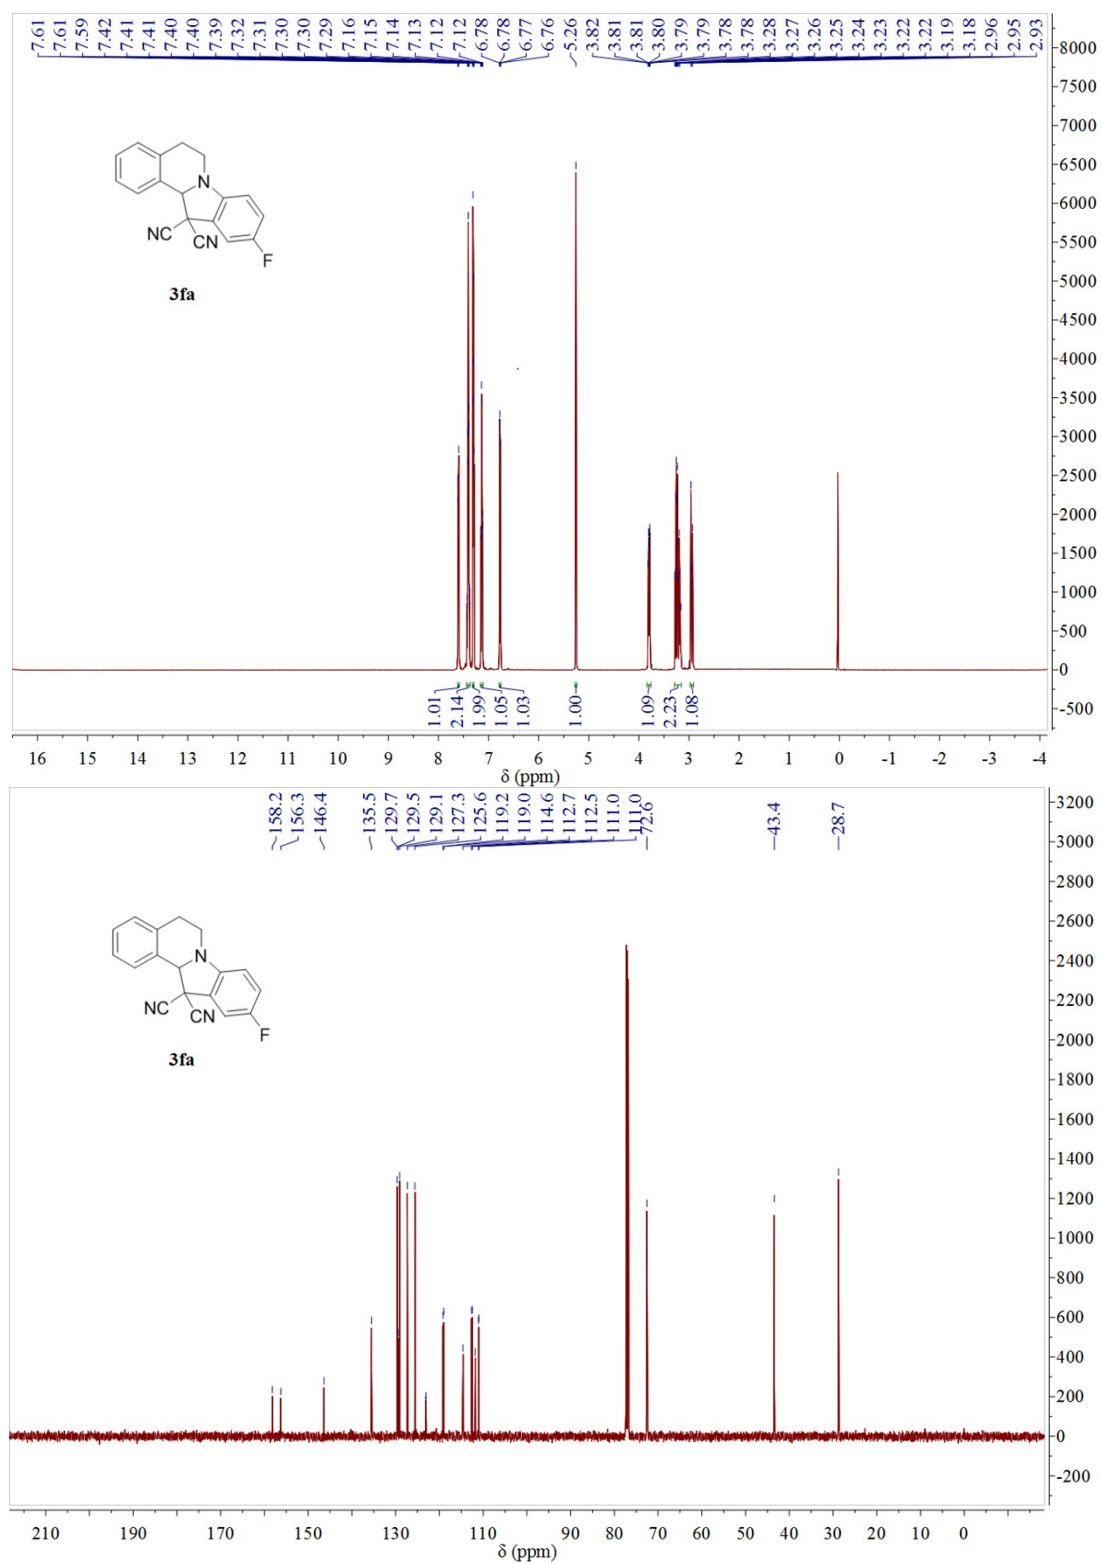

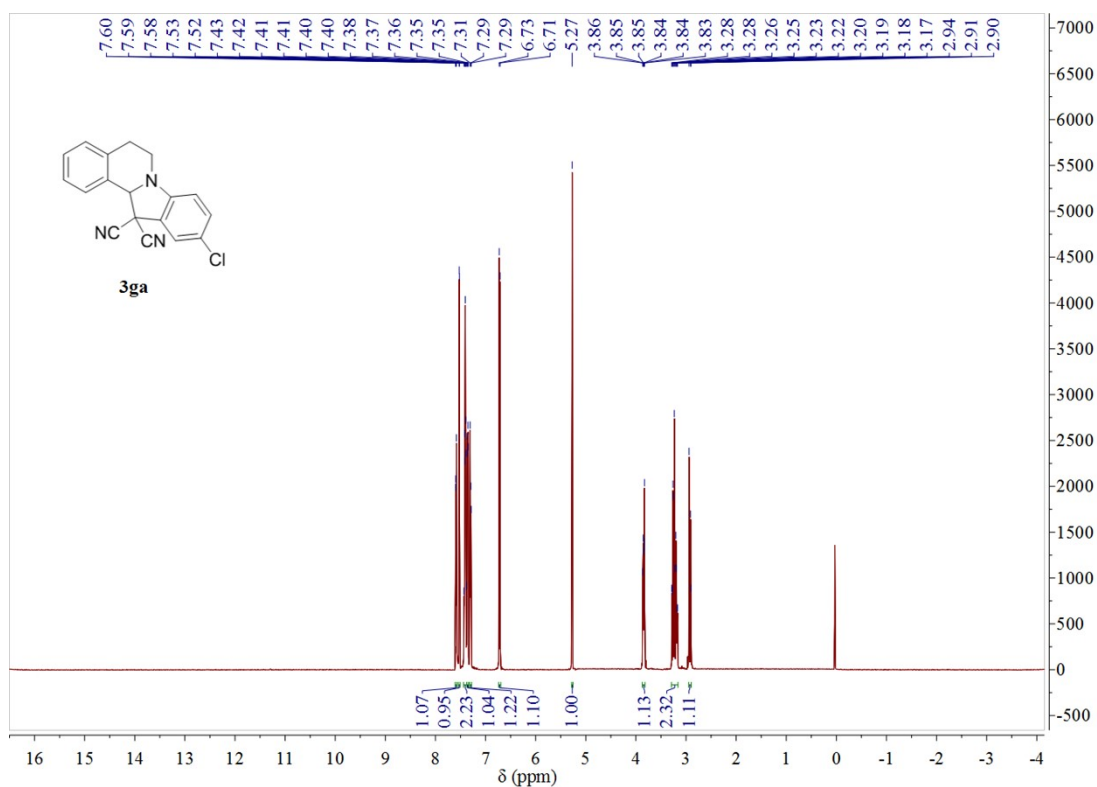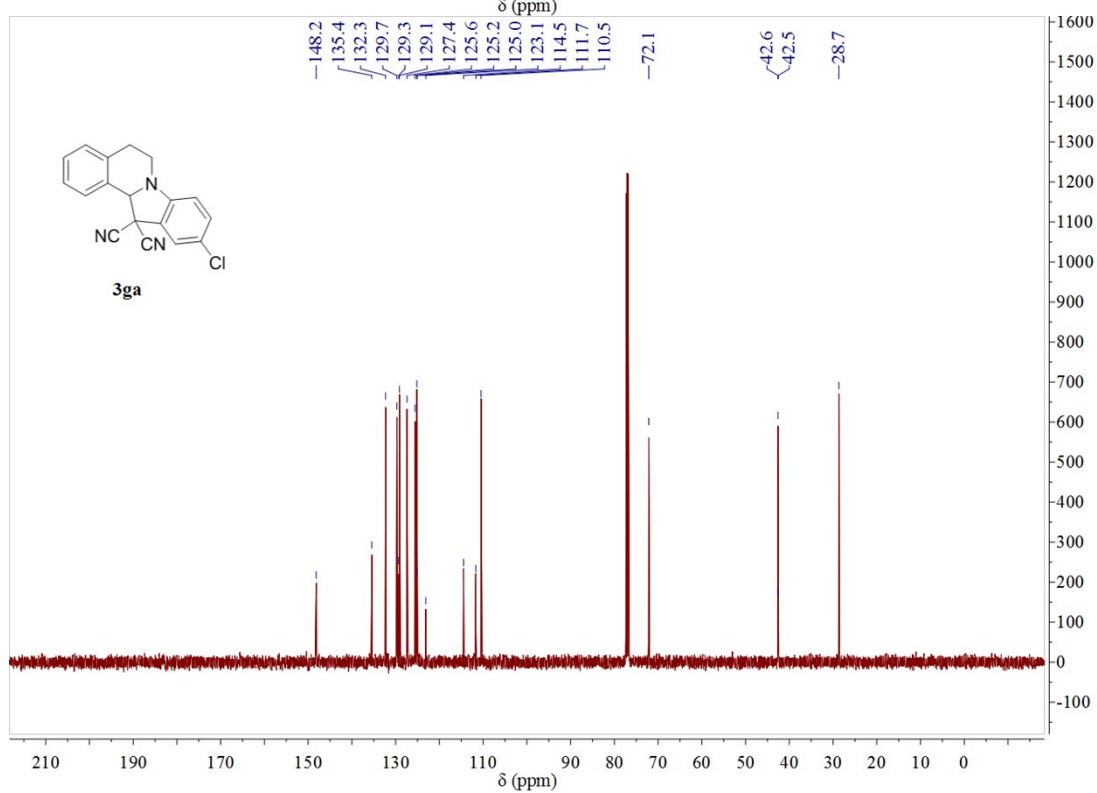

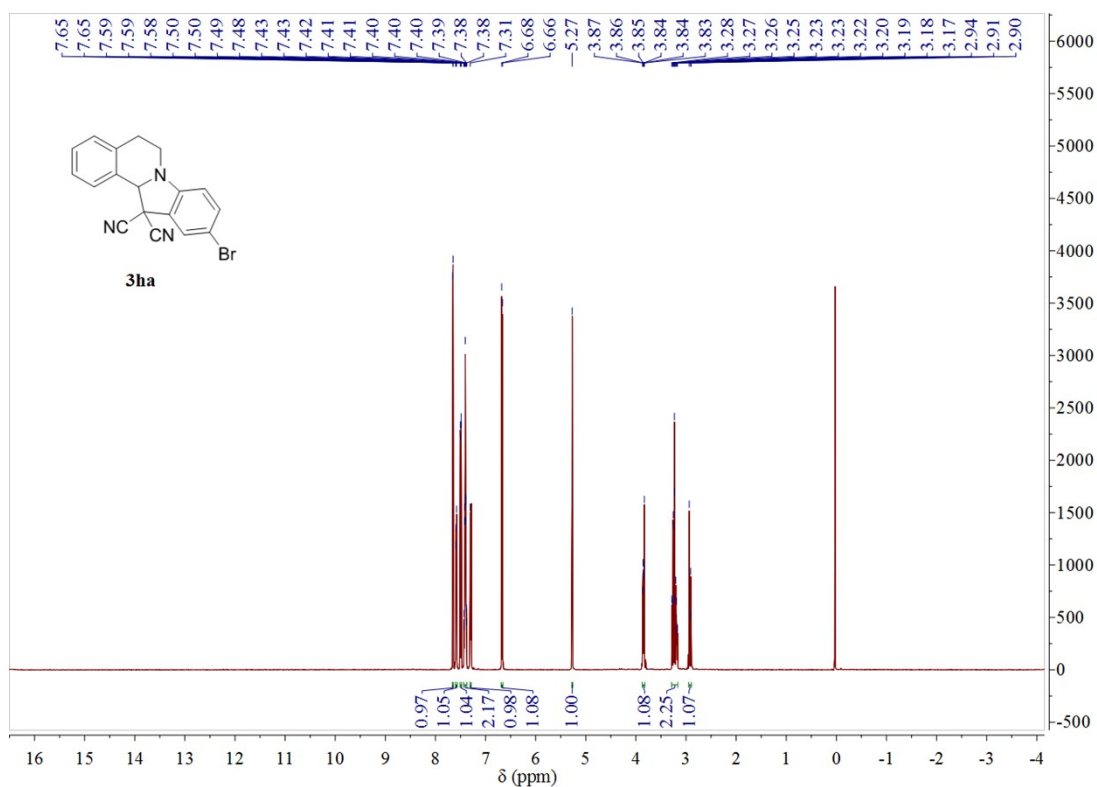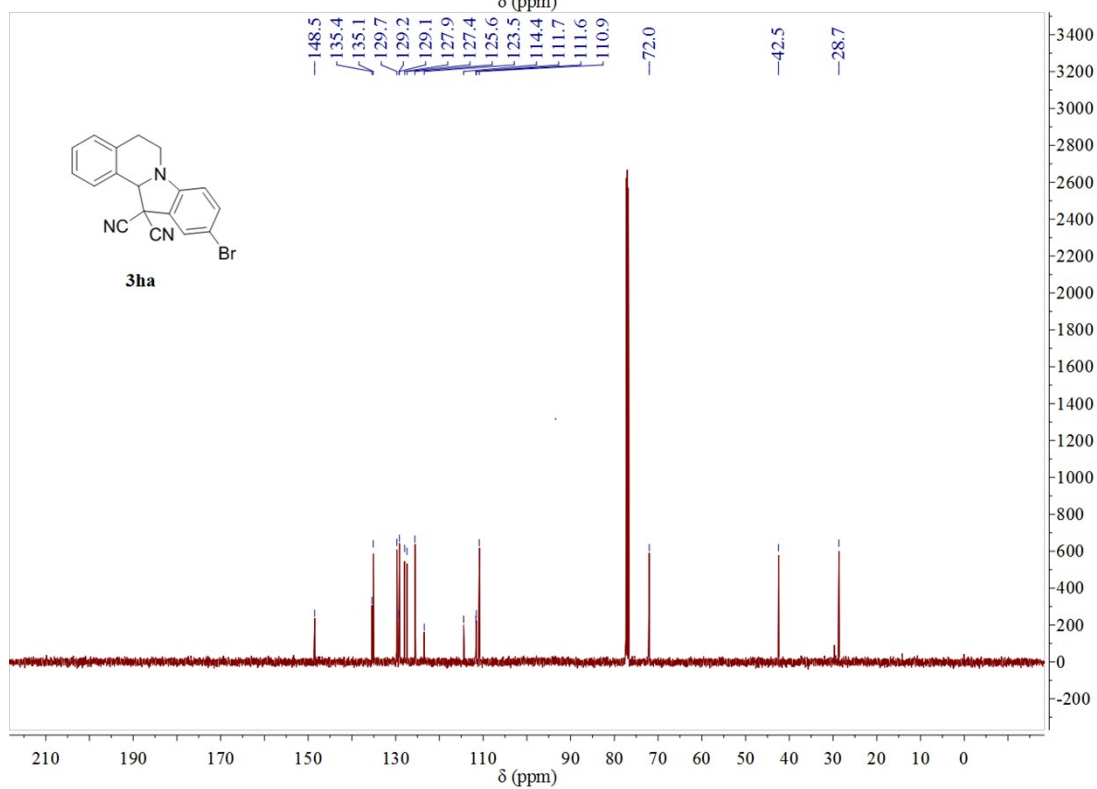



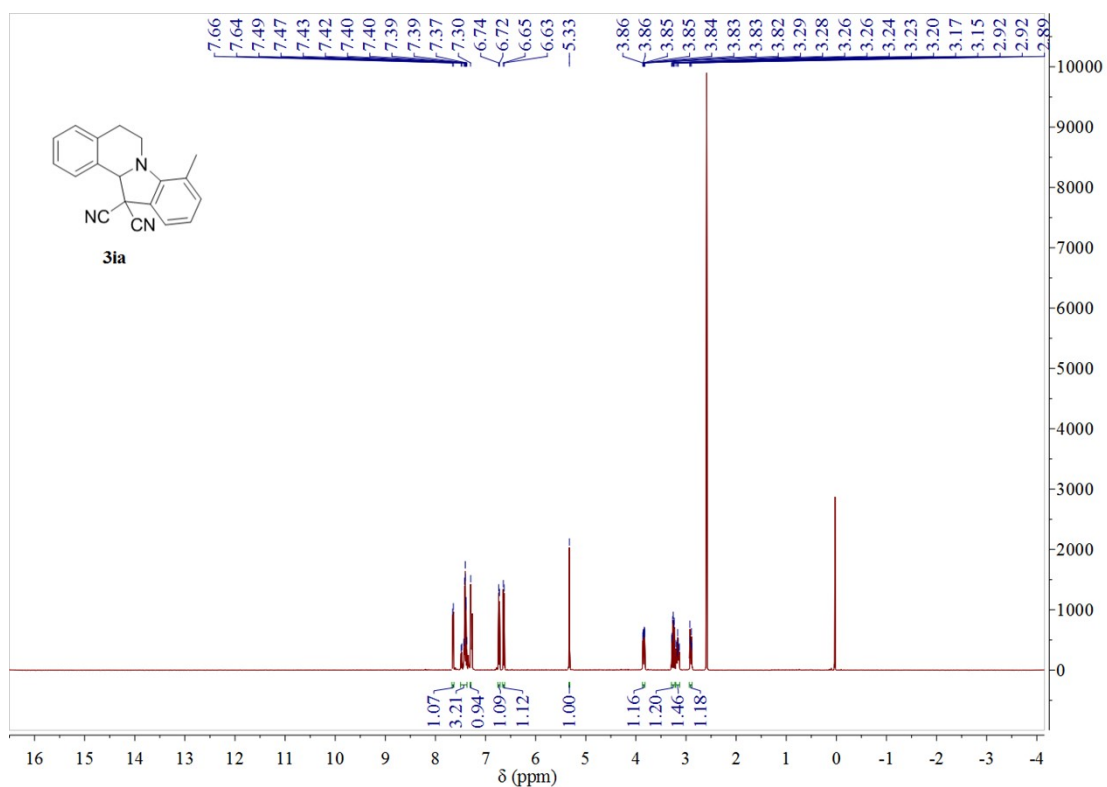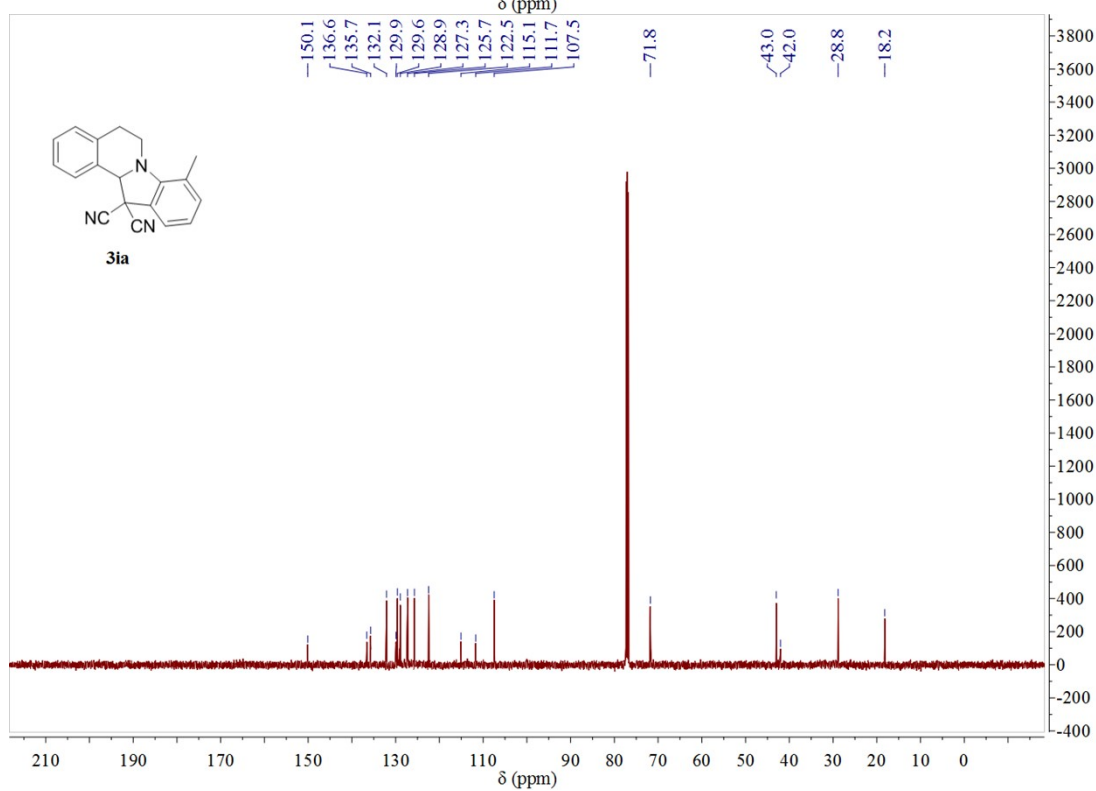

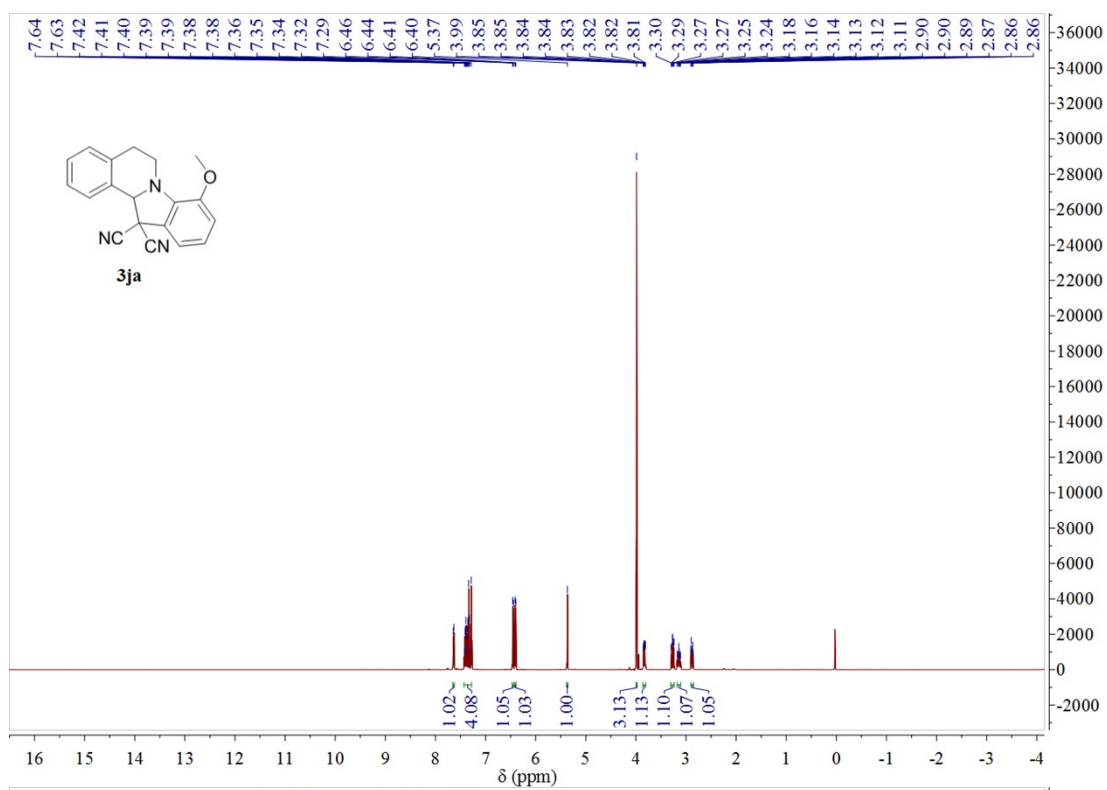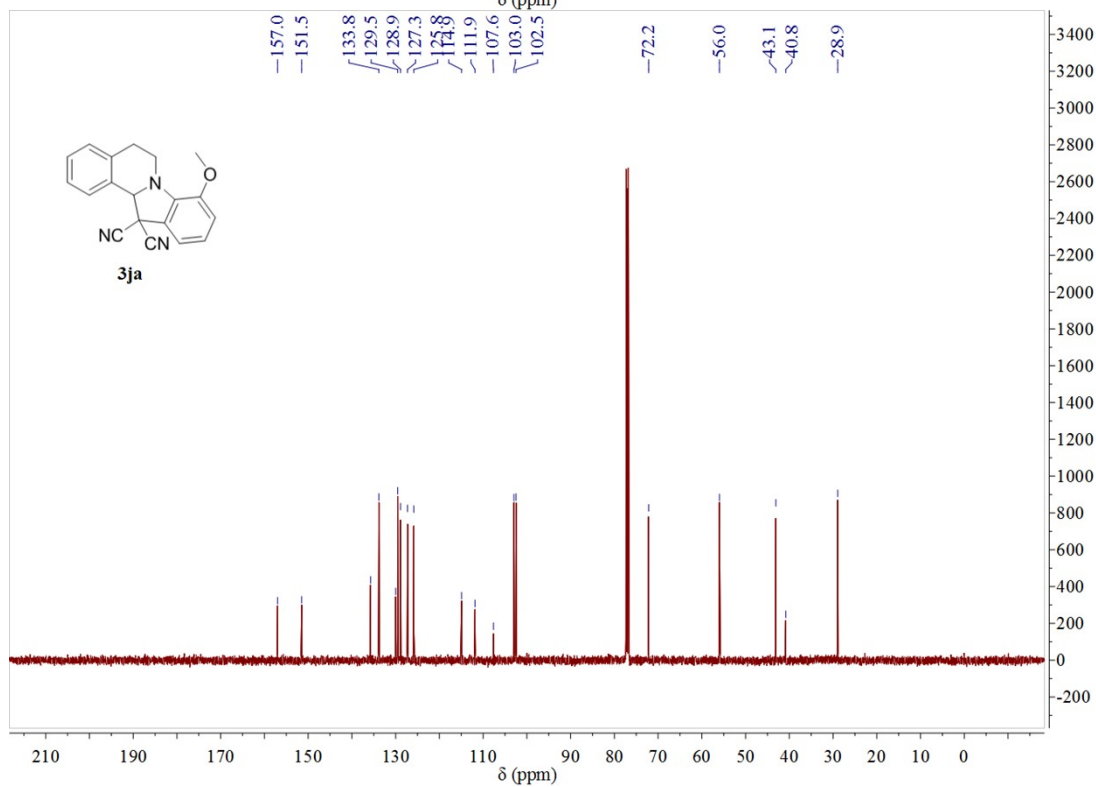

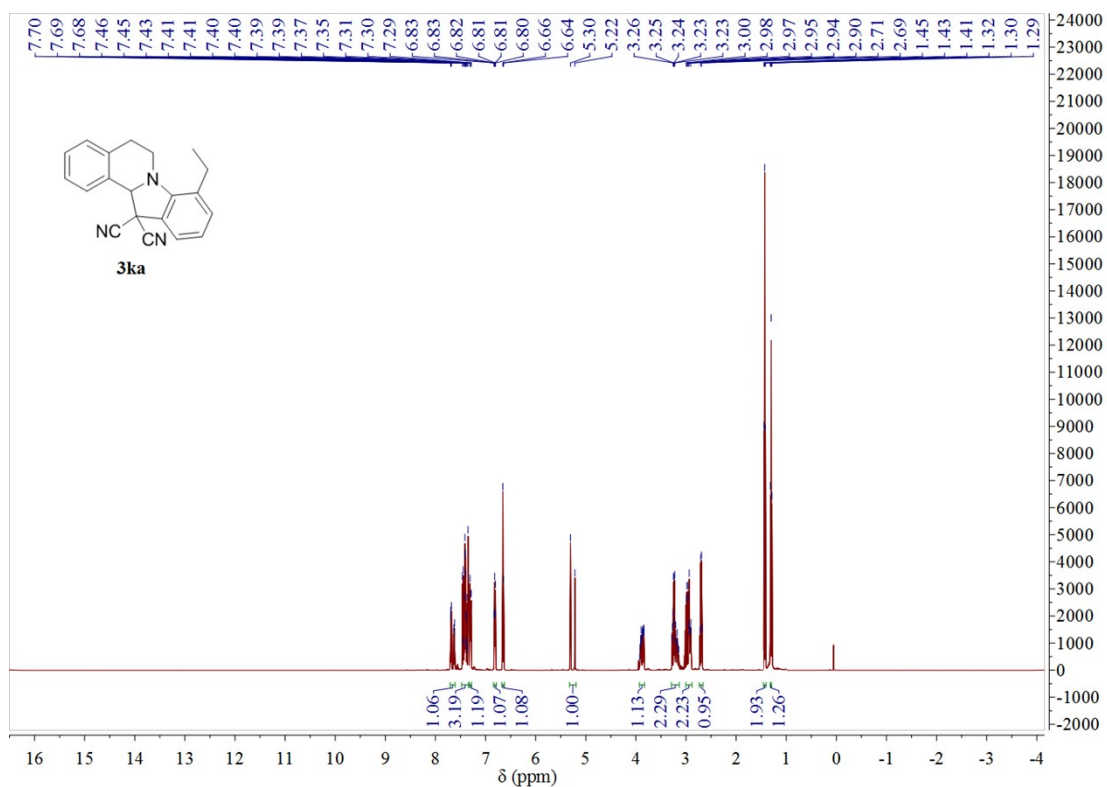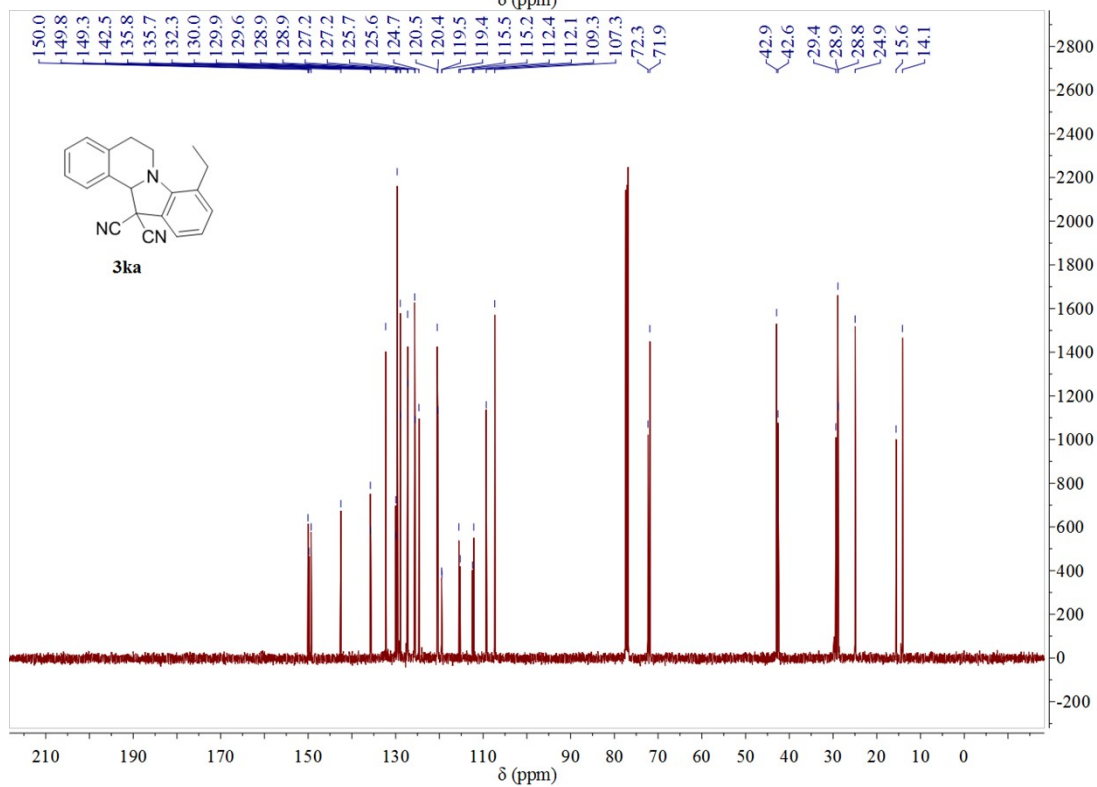

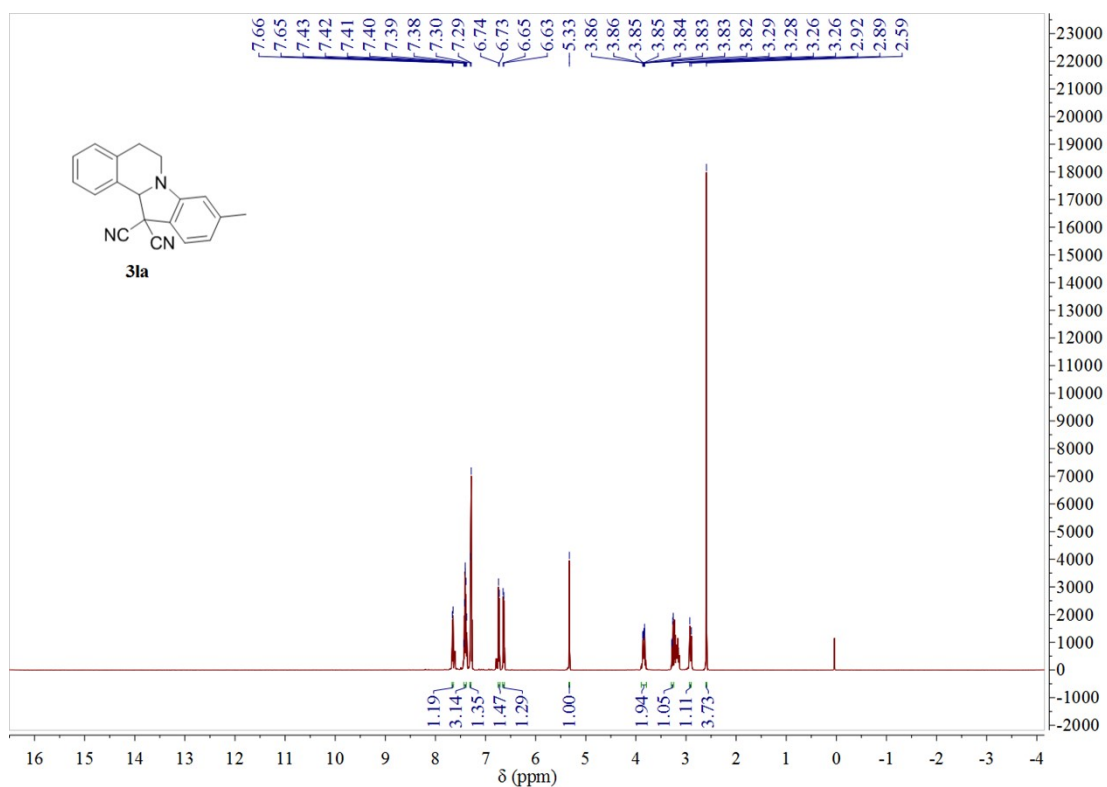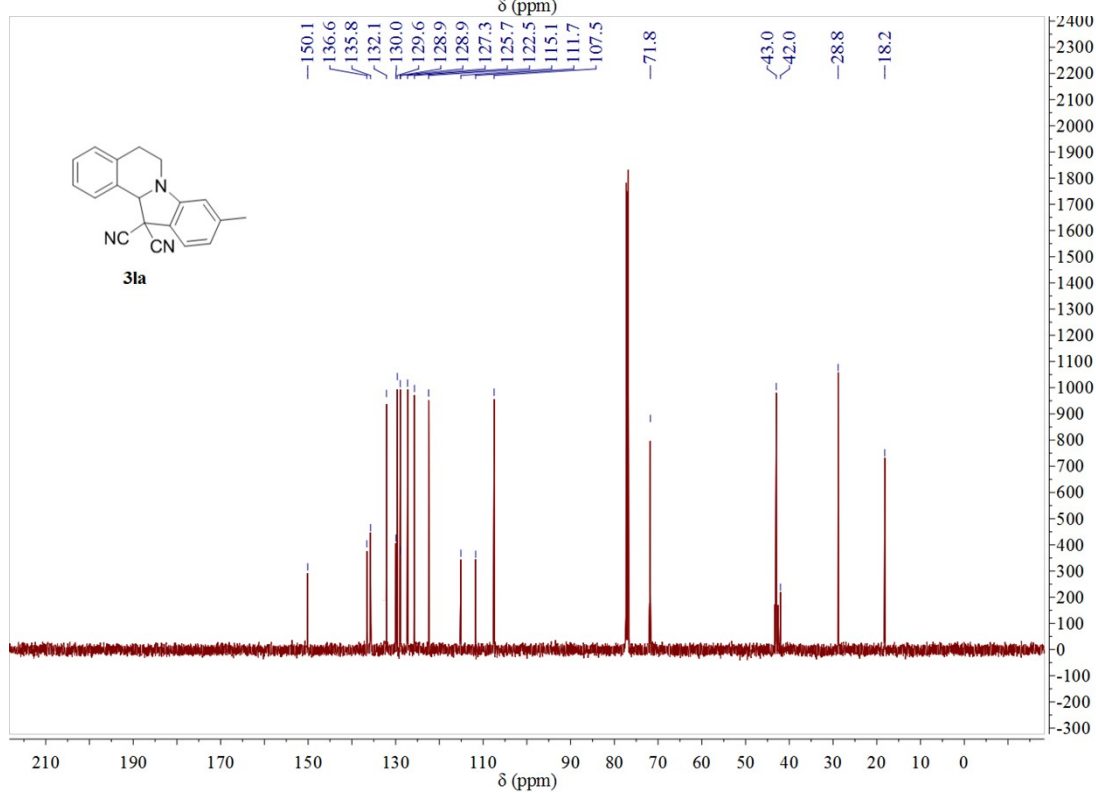

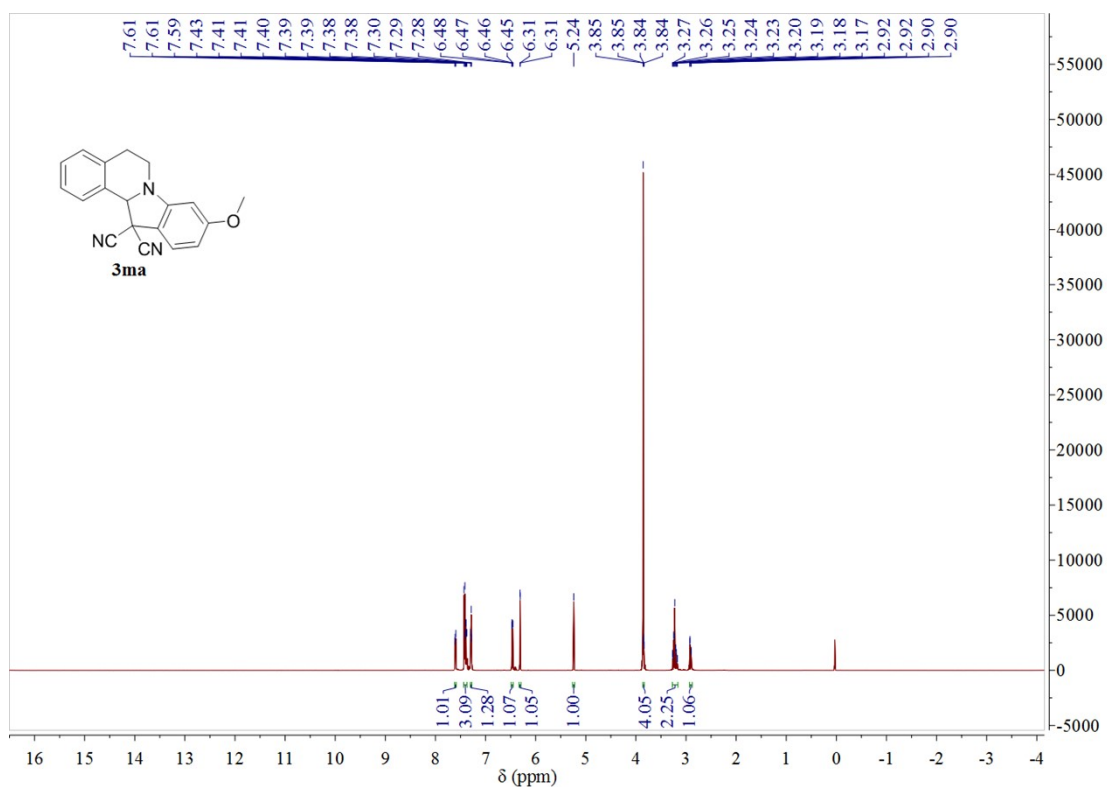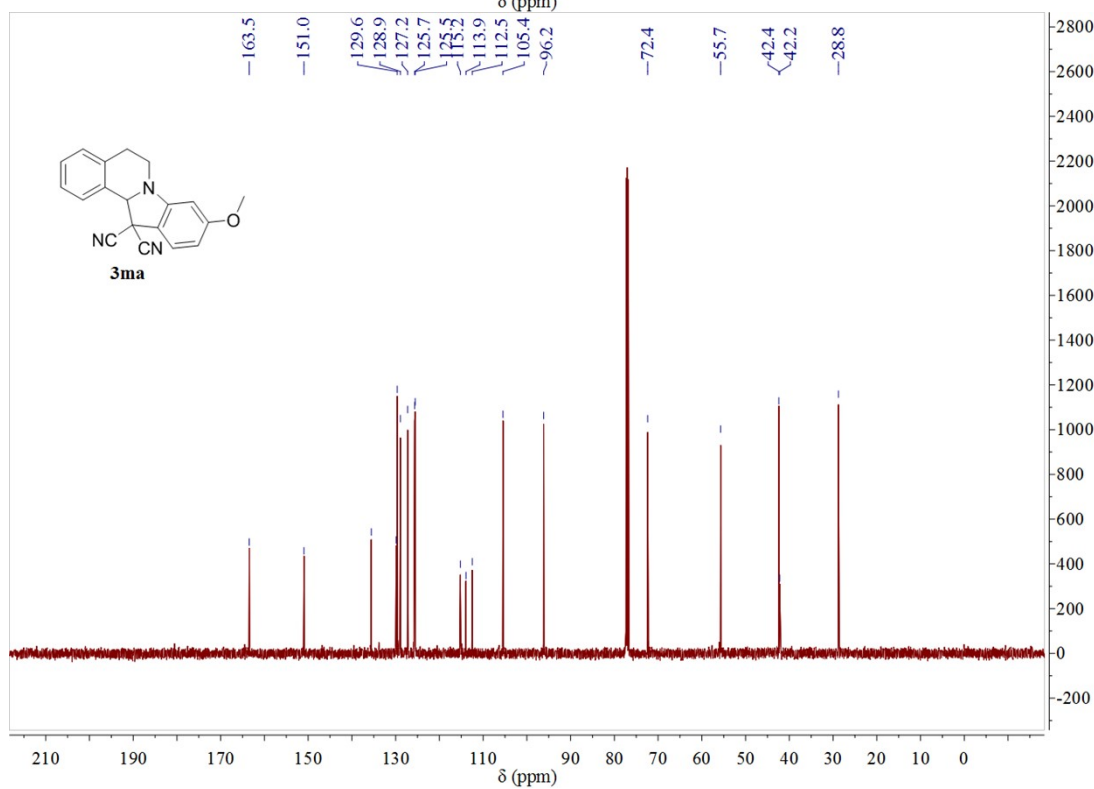

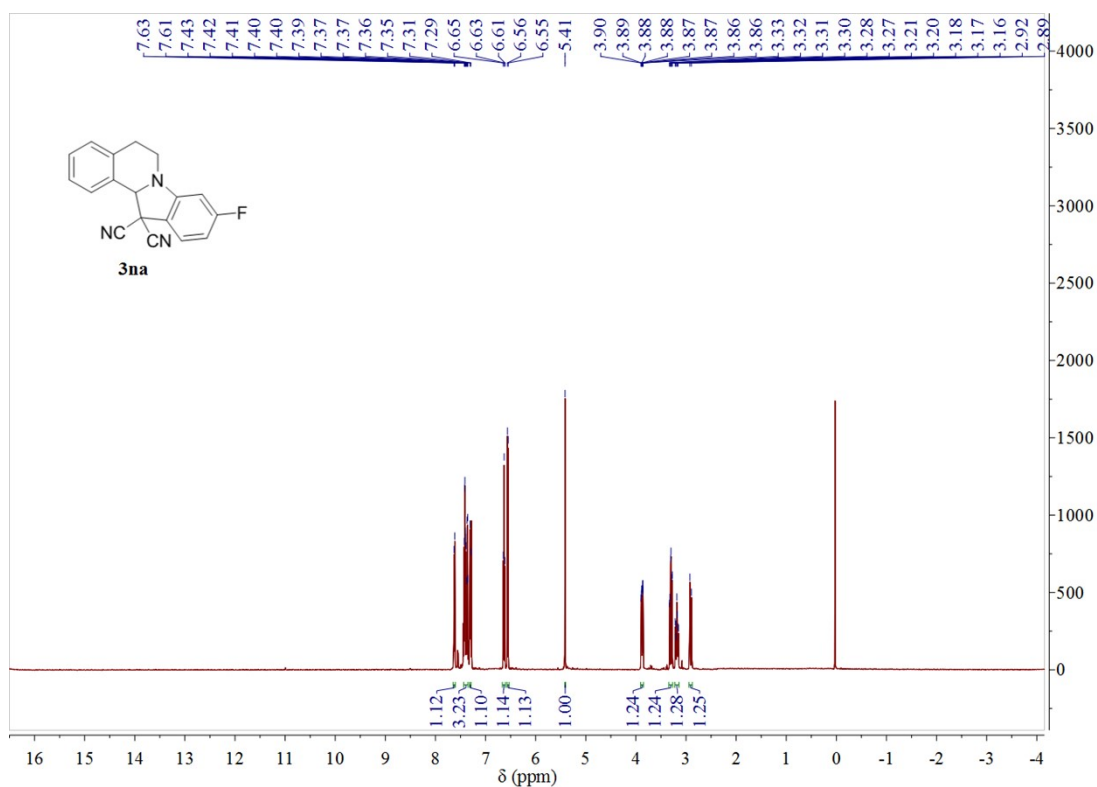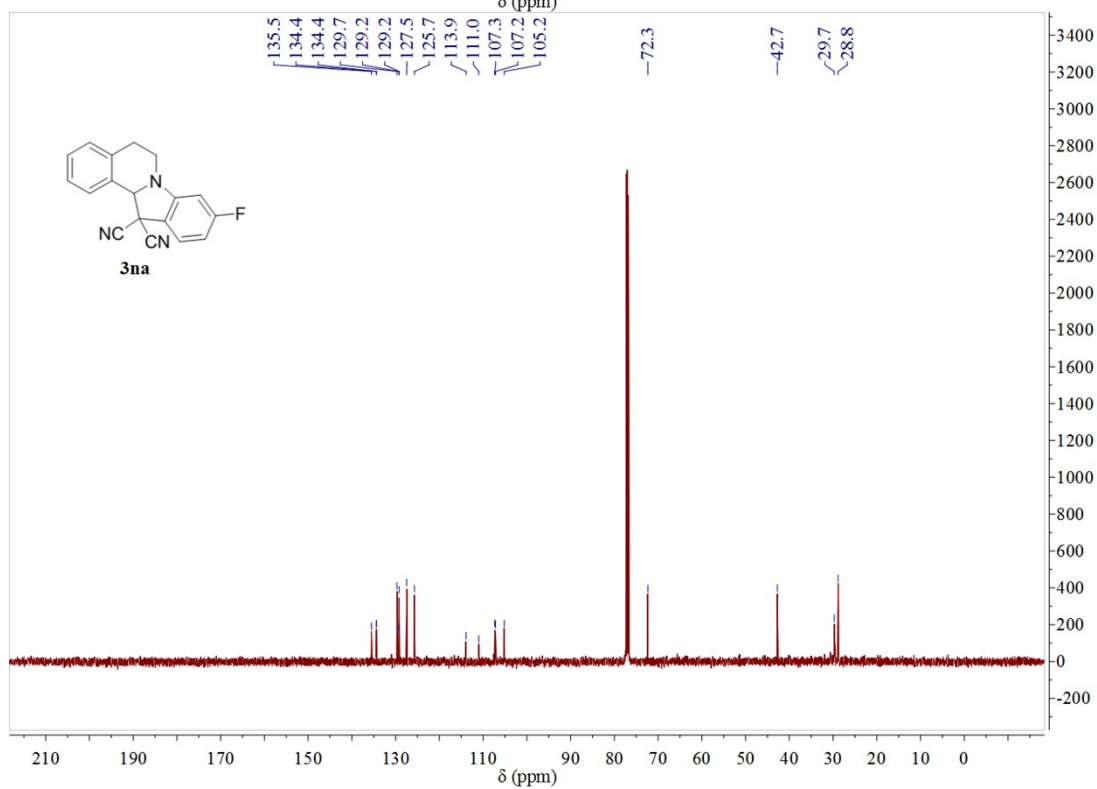

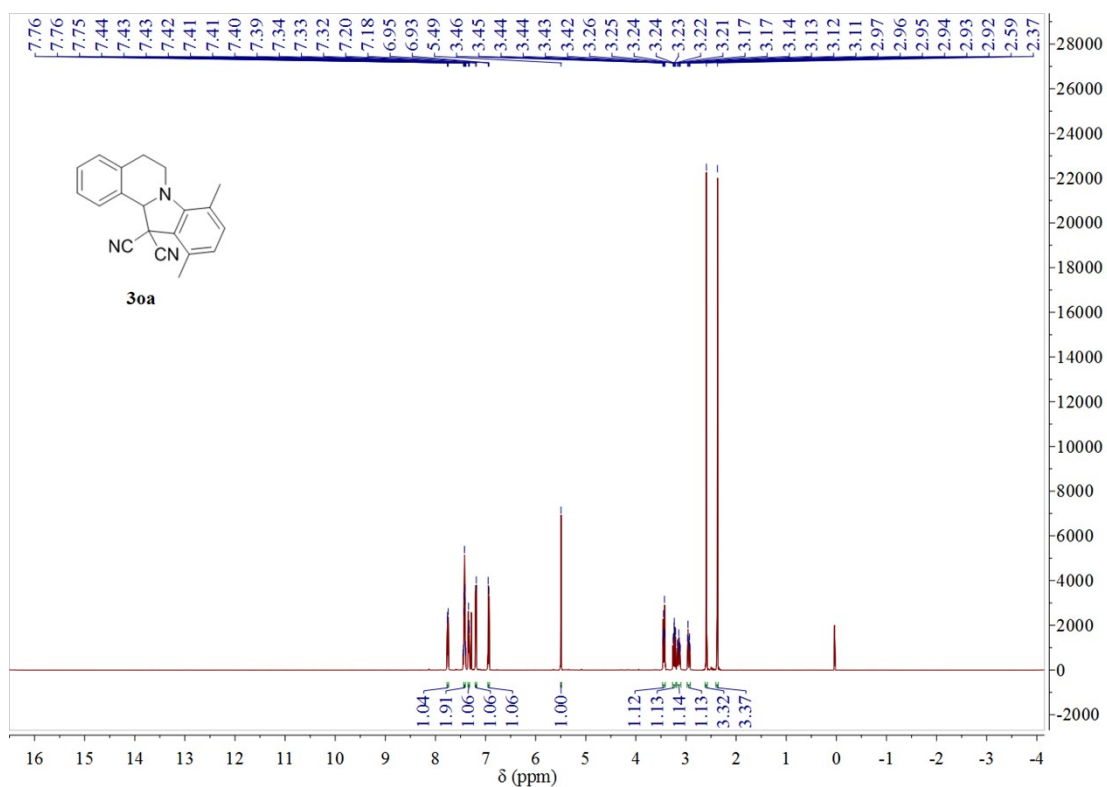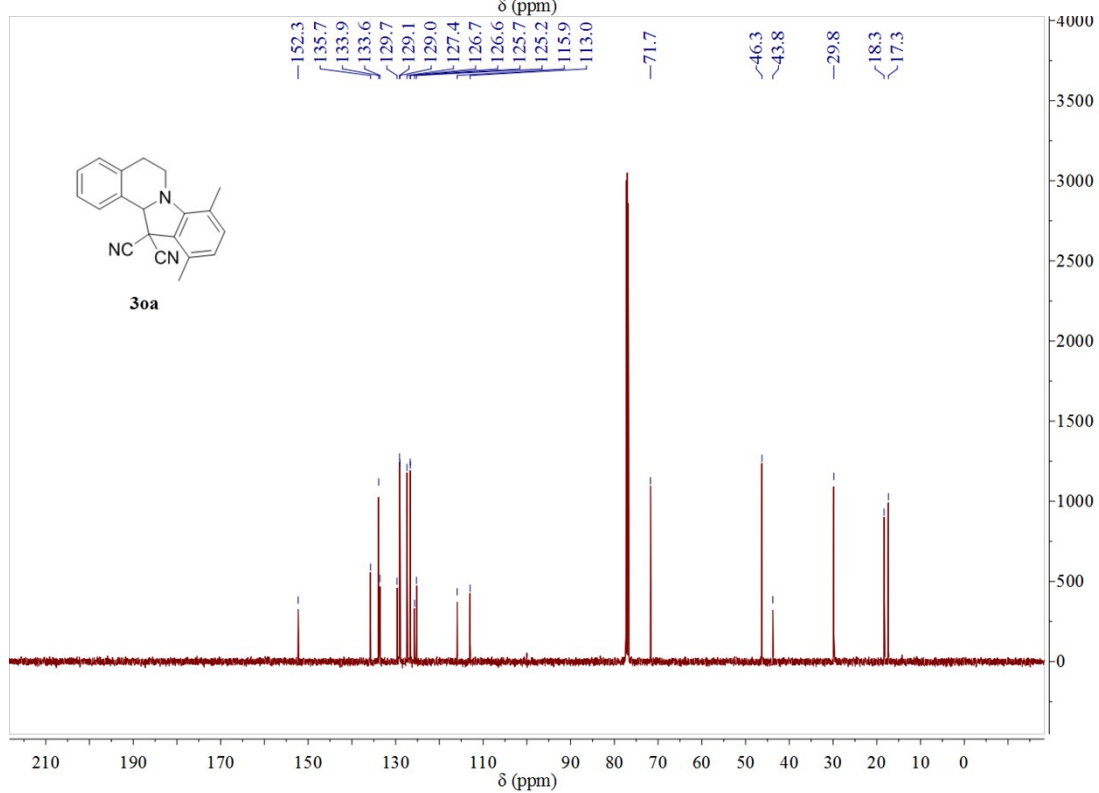

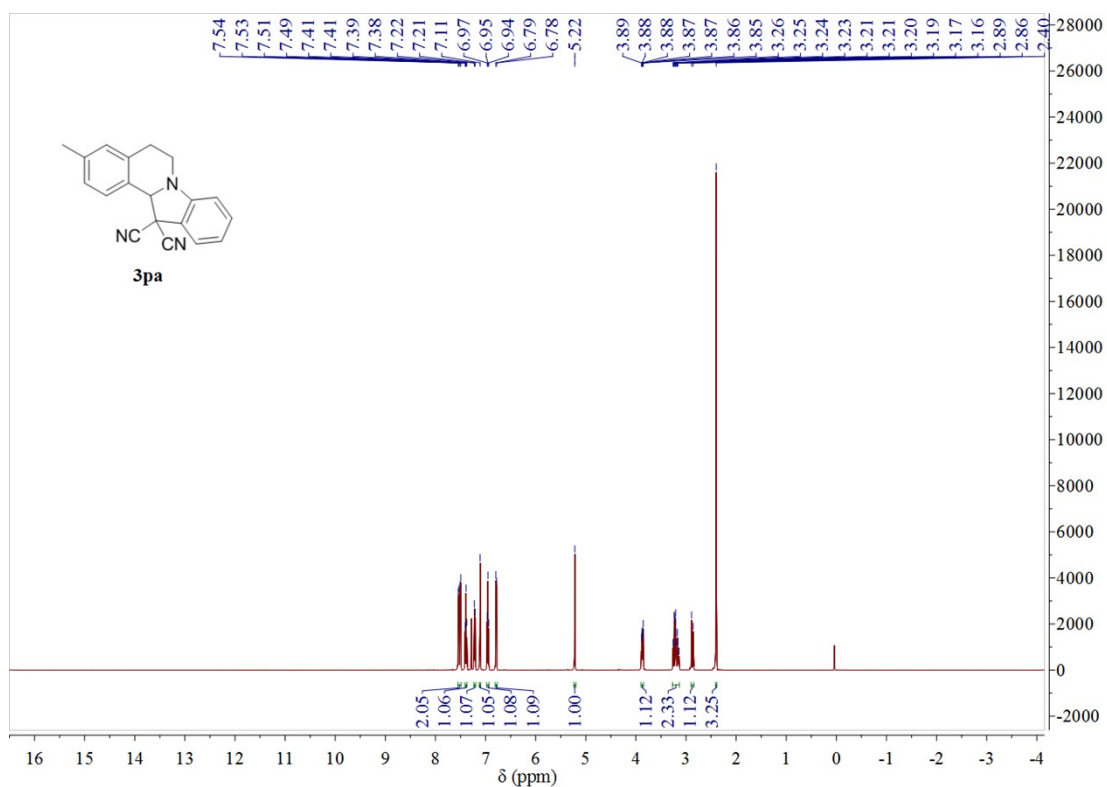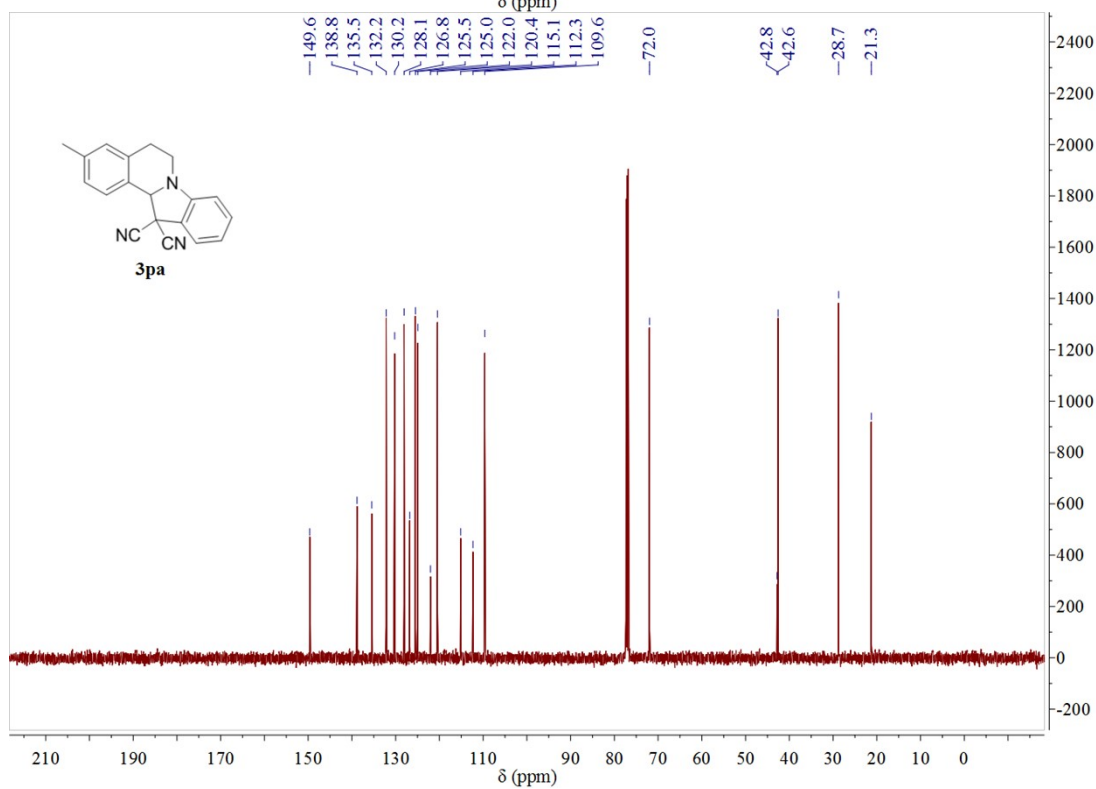



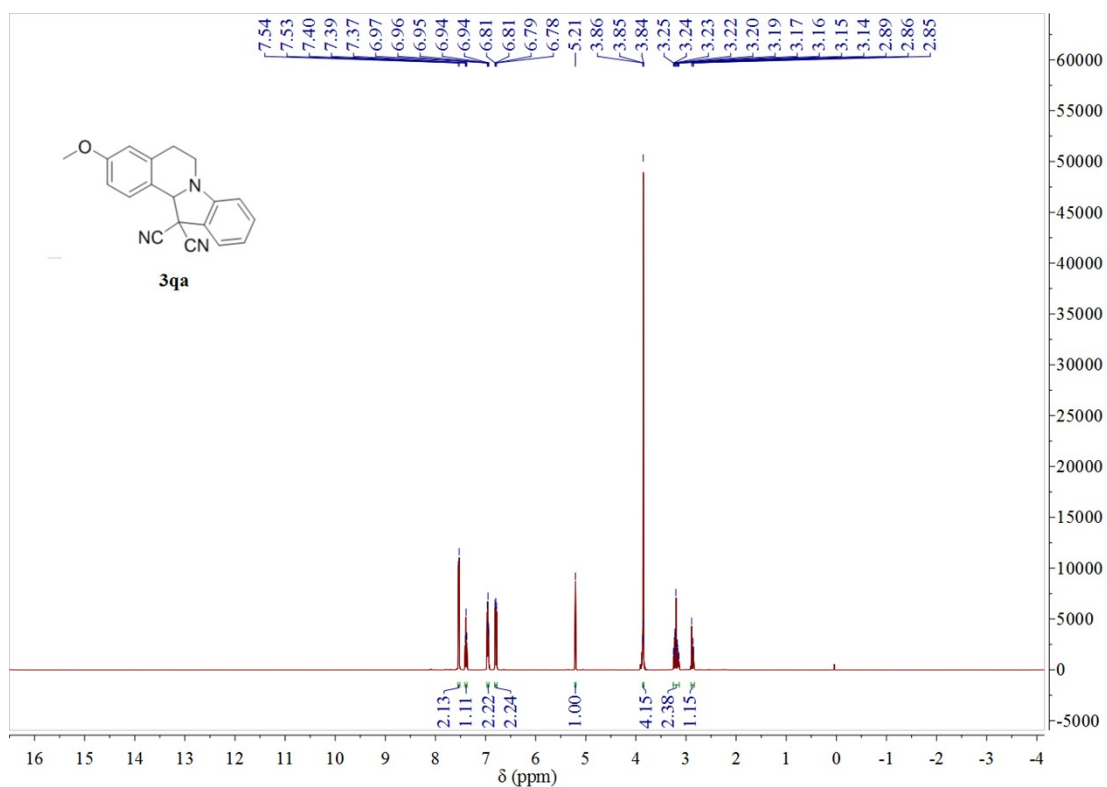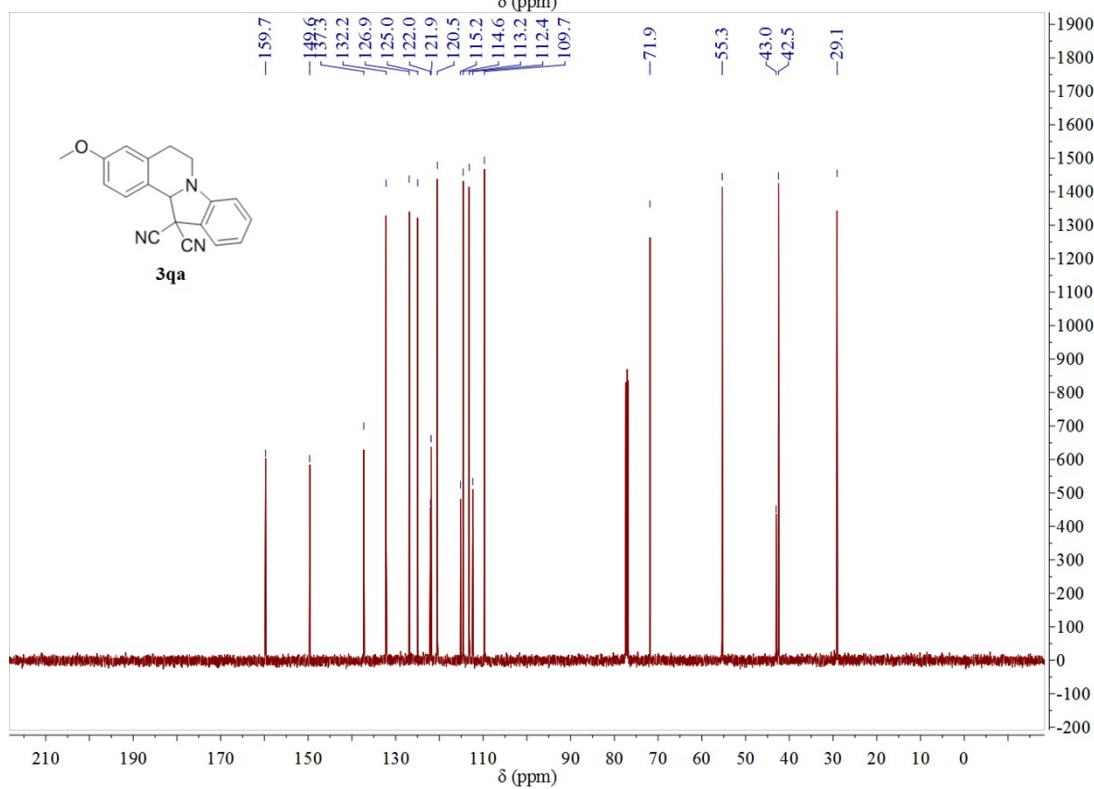

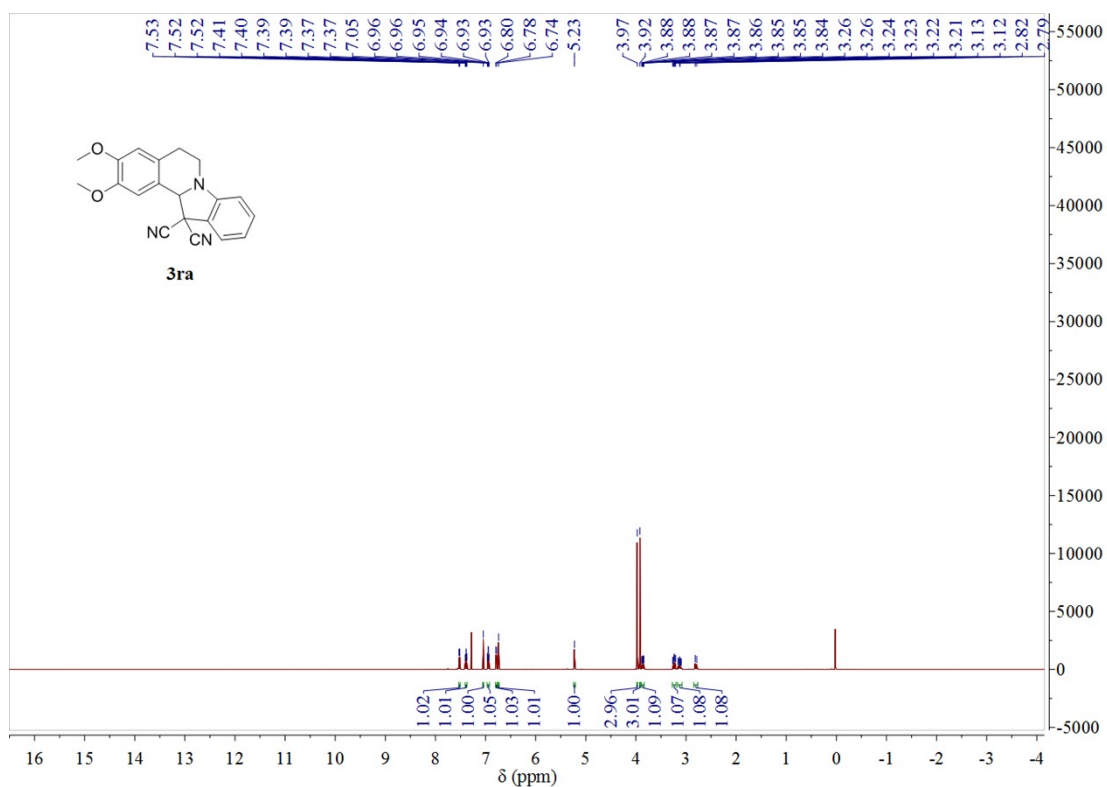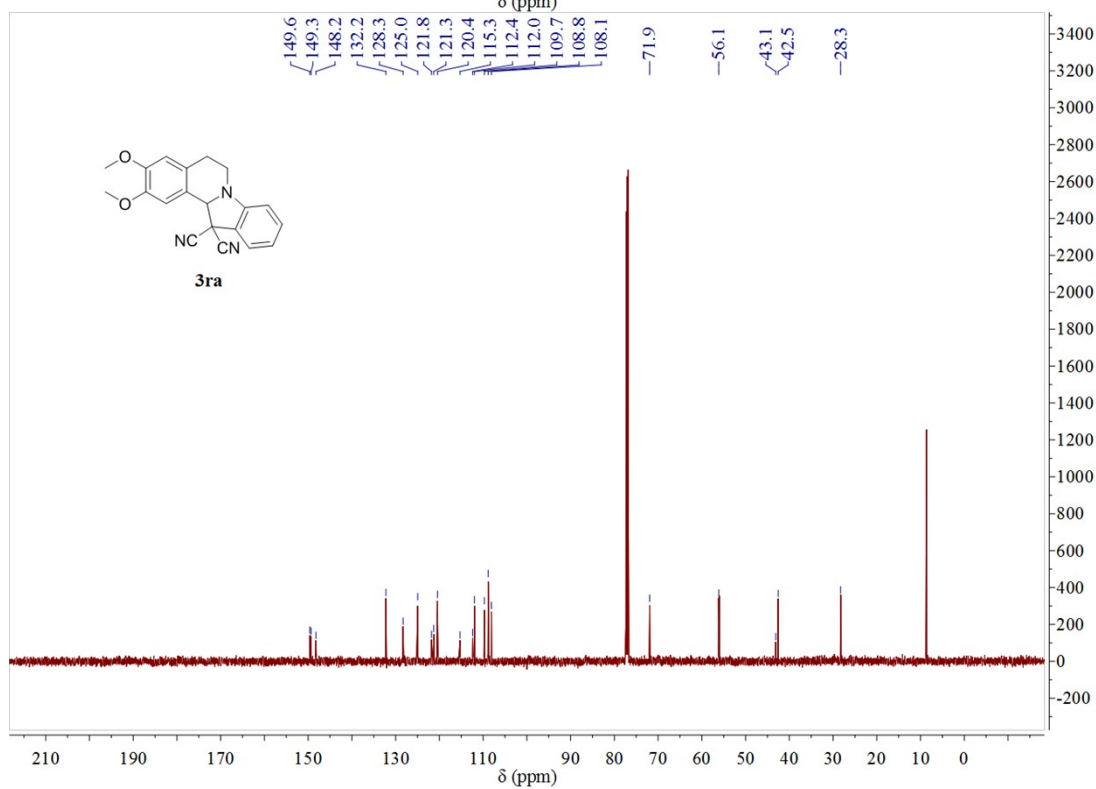

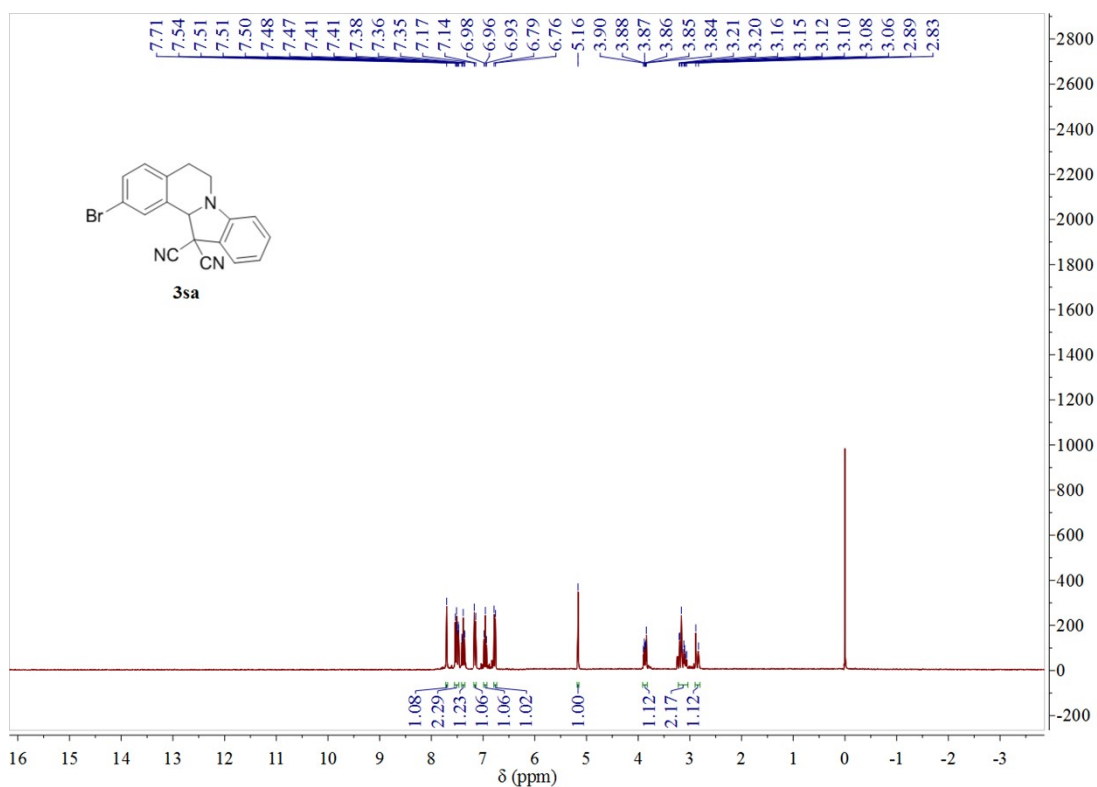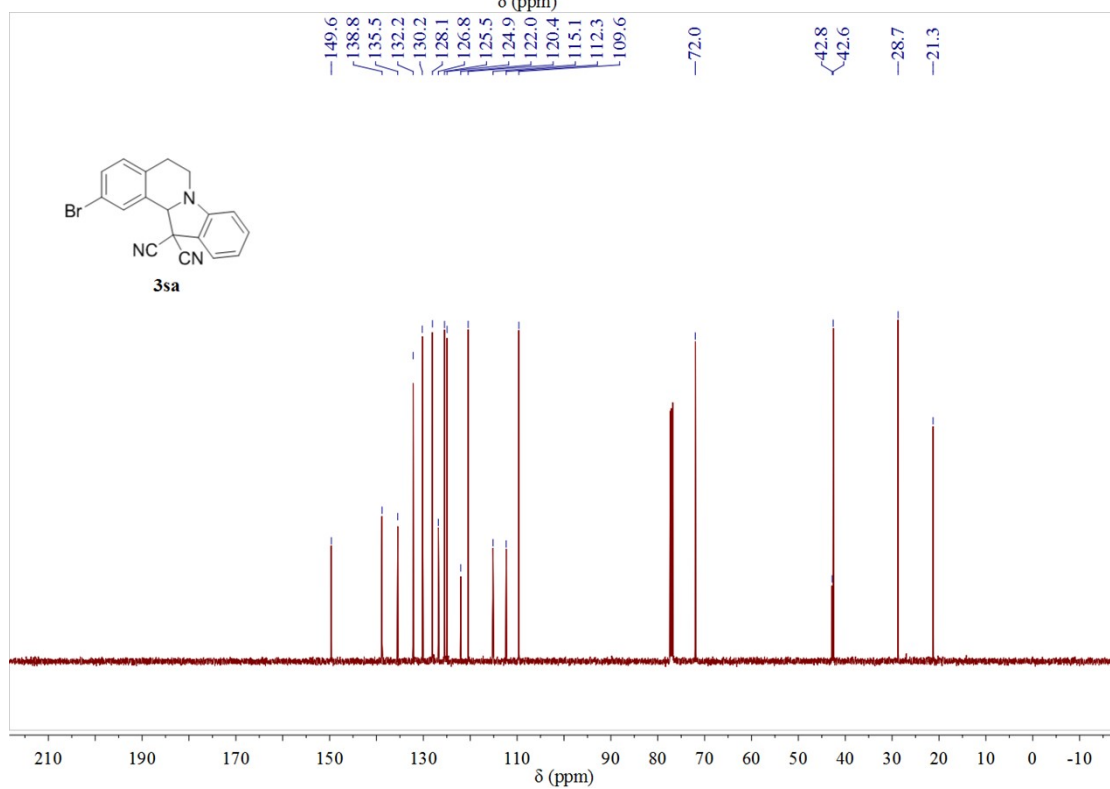

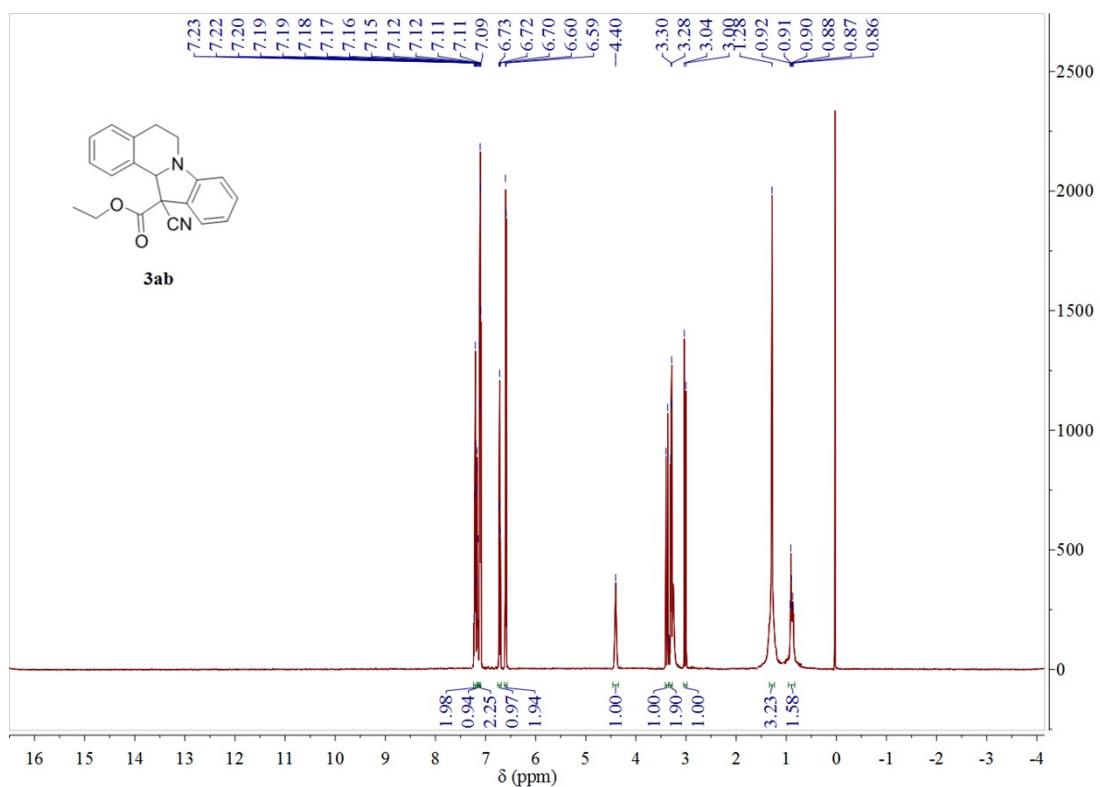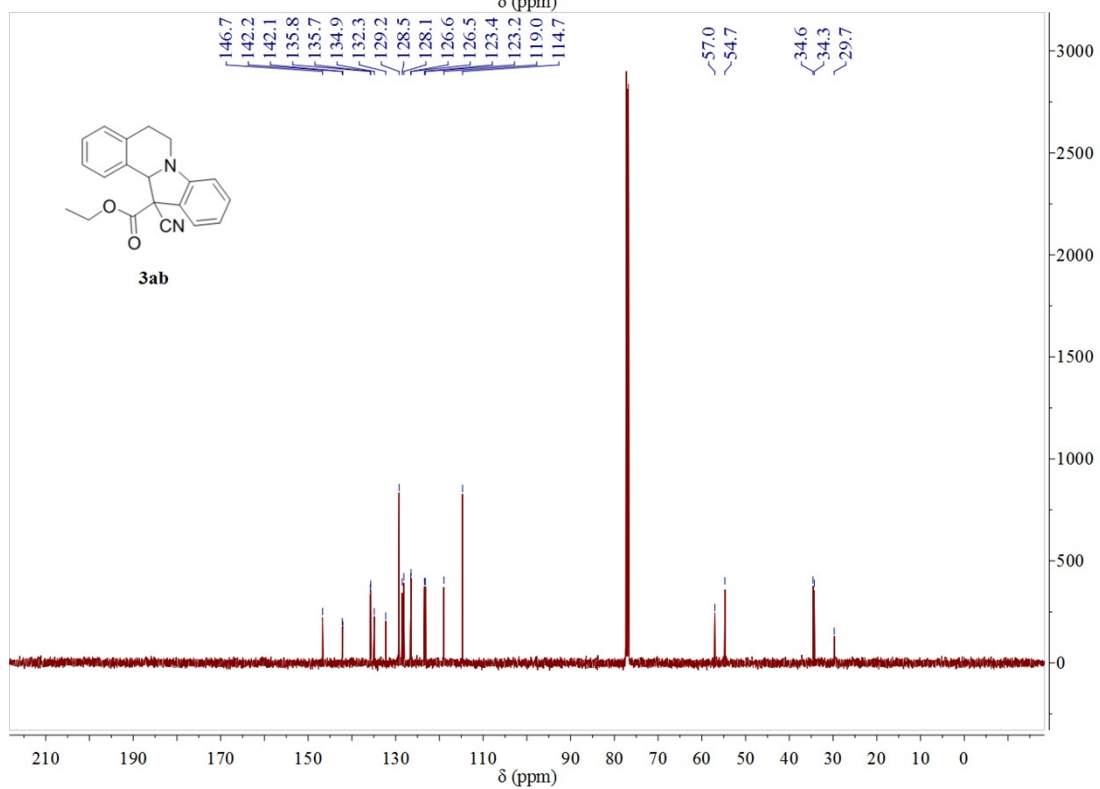

Supplement: d2nj04177d1.pdf [file d2nj04177d1.pdf]
